# Supplementary material for: Enaminone-Linked Quasi-One-Dimensional Covalent Organic Frameworks for CO2 Photoreduction with Water
Source: Research Square preprint supplement (doi:10.21203/rs.3.rs-7361141/v1), 2025-08-20
Supplement: Supplementary file 1 [file 5c9b721fddadc82b7adb003a.docx]

Supporting Information

**Enaminone-Linked Quasi-One-Dimensional Covalent Organic Frameworks for CO2 Photoreduction with Water**

Junxian Bai, Yuxin Hu, Fangyuan Si, Yan Li, Guijie Liang, Tingting Hou*, Yingwei Li*

**Results and discussion**

**
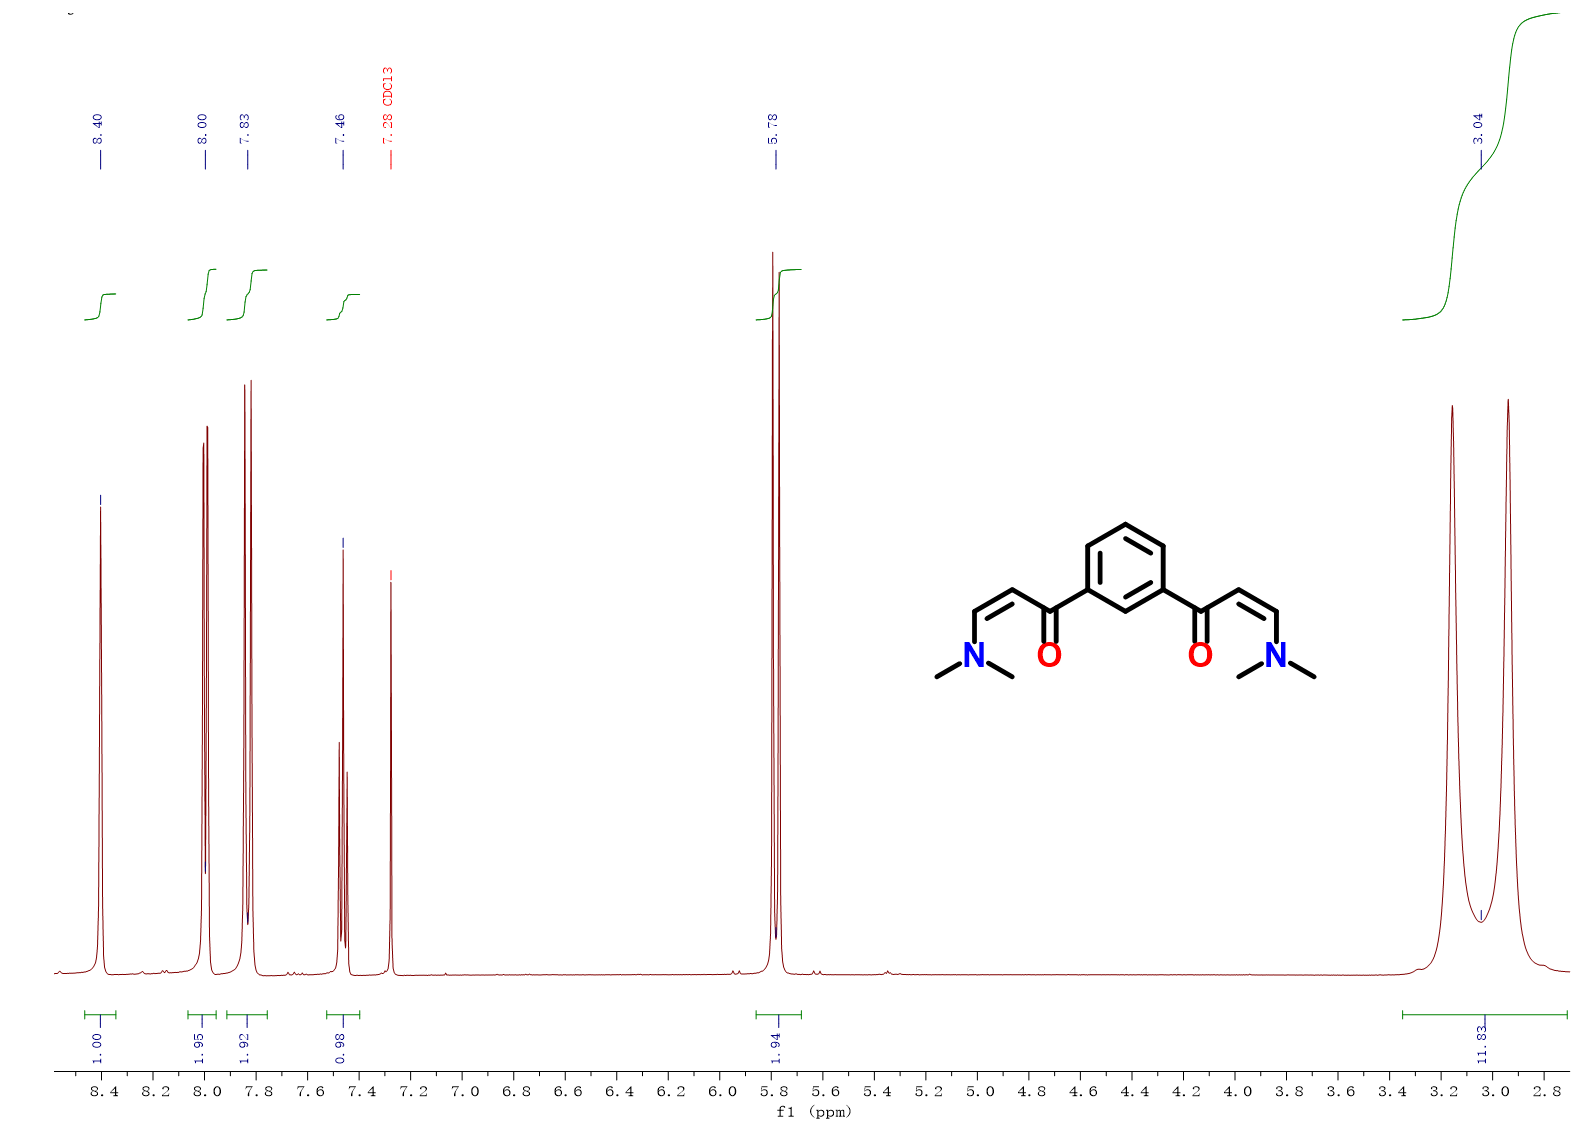
**

**Figure S1.** The 1H NMR spectrum of PDP.

**
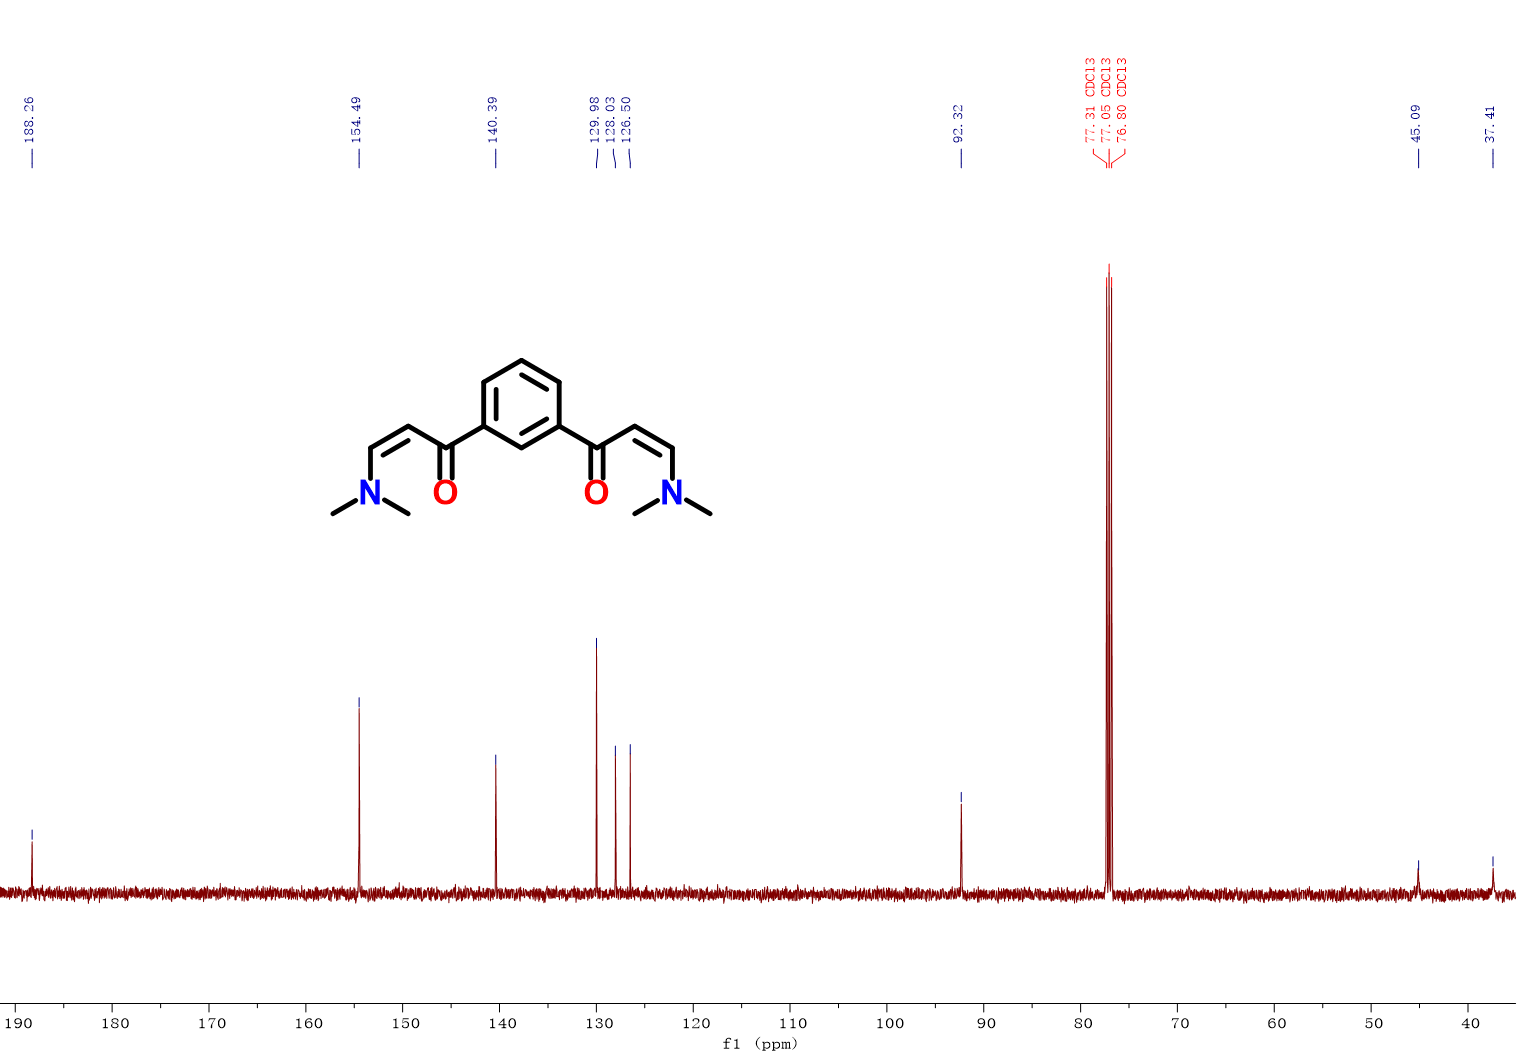
**

**Figure S2.** The 13C NMR spectrum of PDP.

**
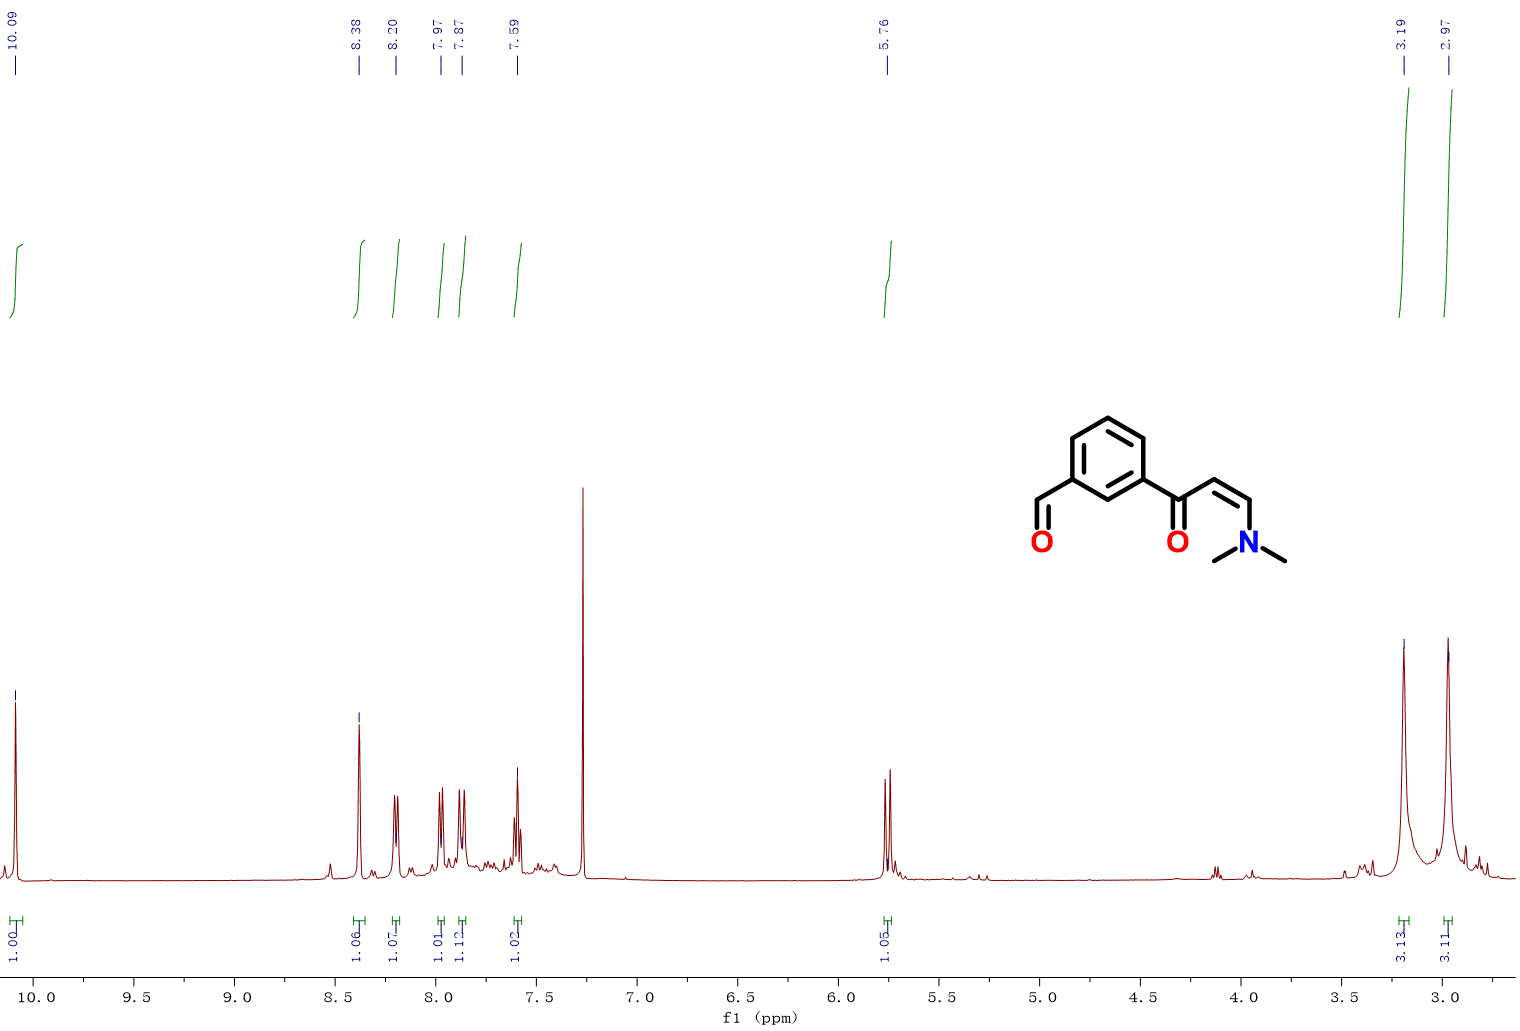
**

**Figure S3.** The 1H NMR spectrum of BDP.


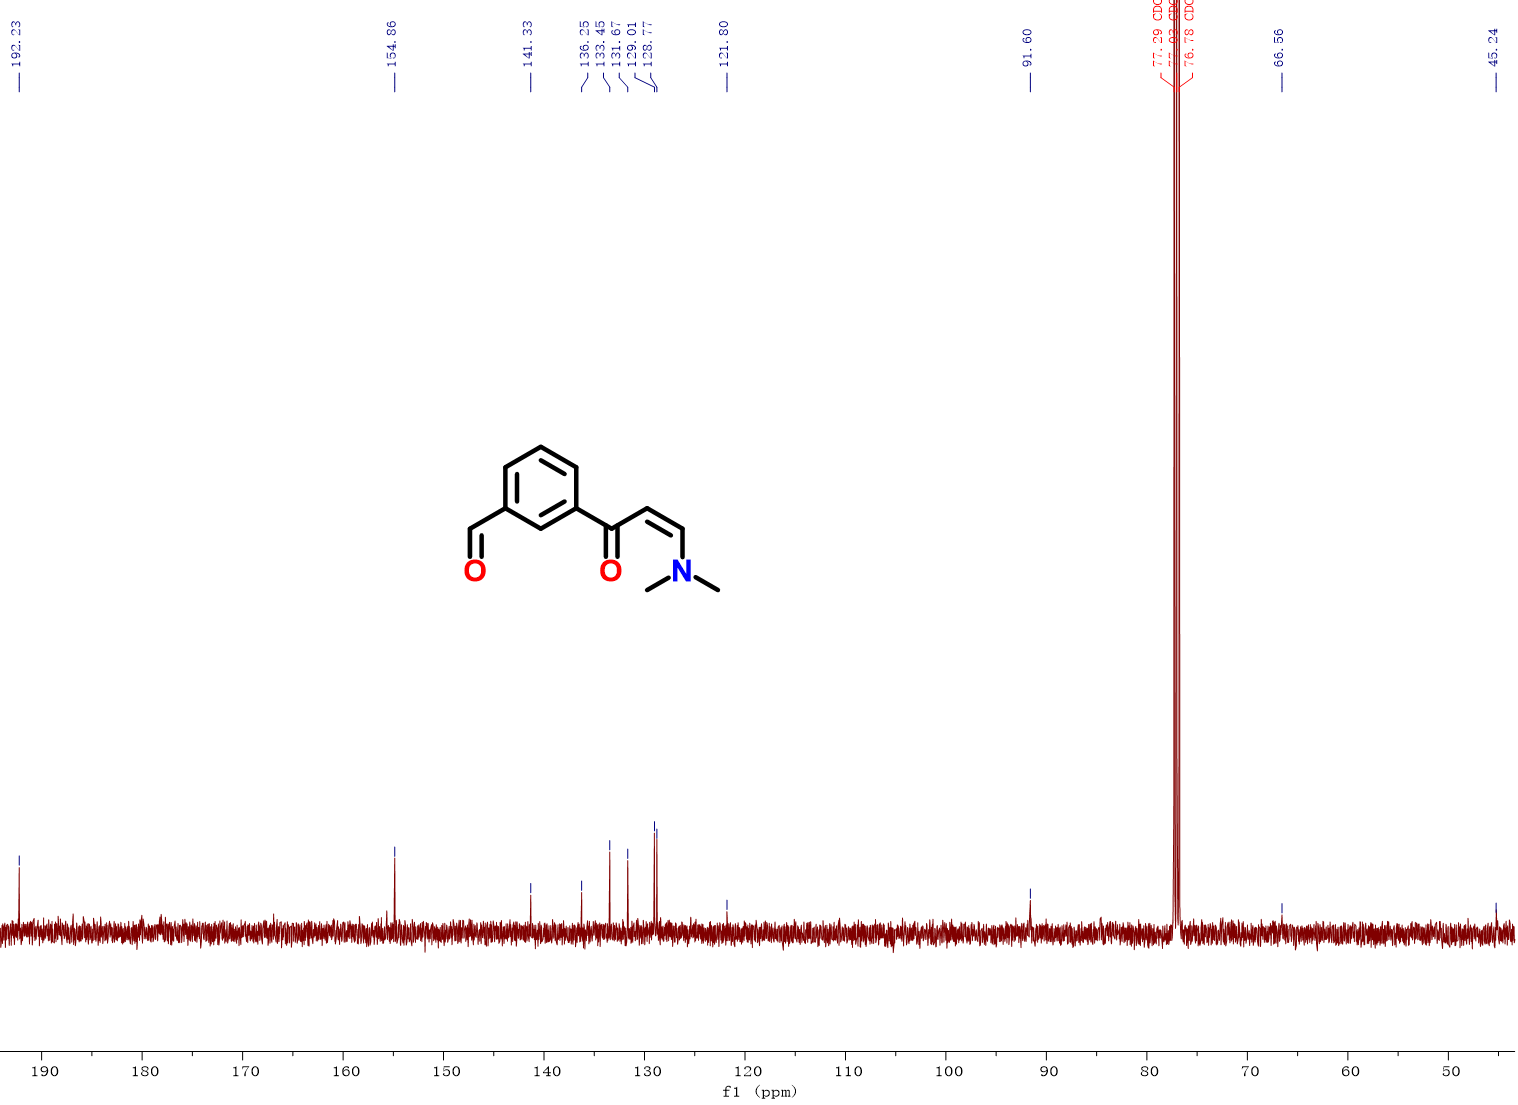


**Figure S4.** The 13C NMR spectrum of BDP.

=


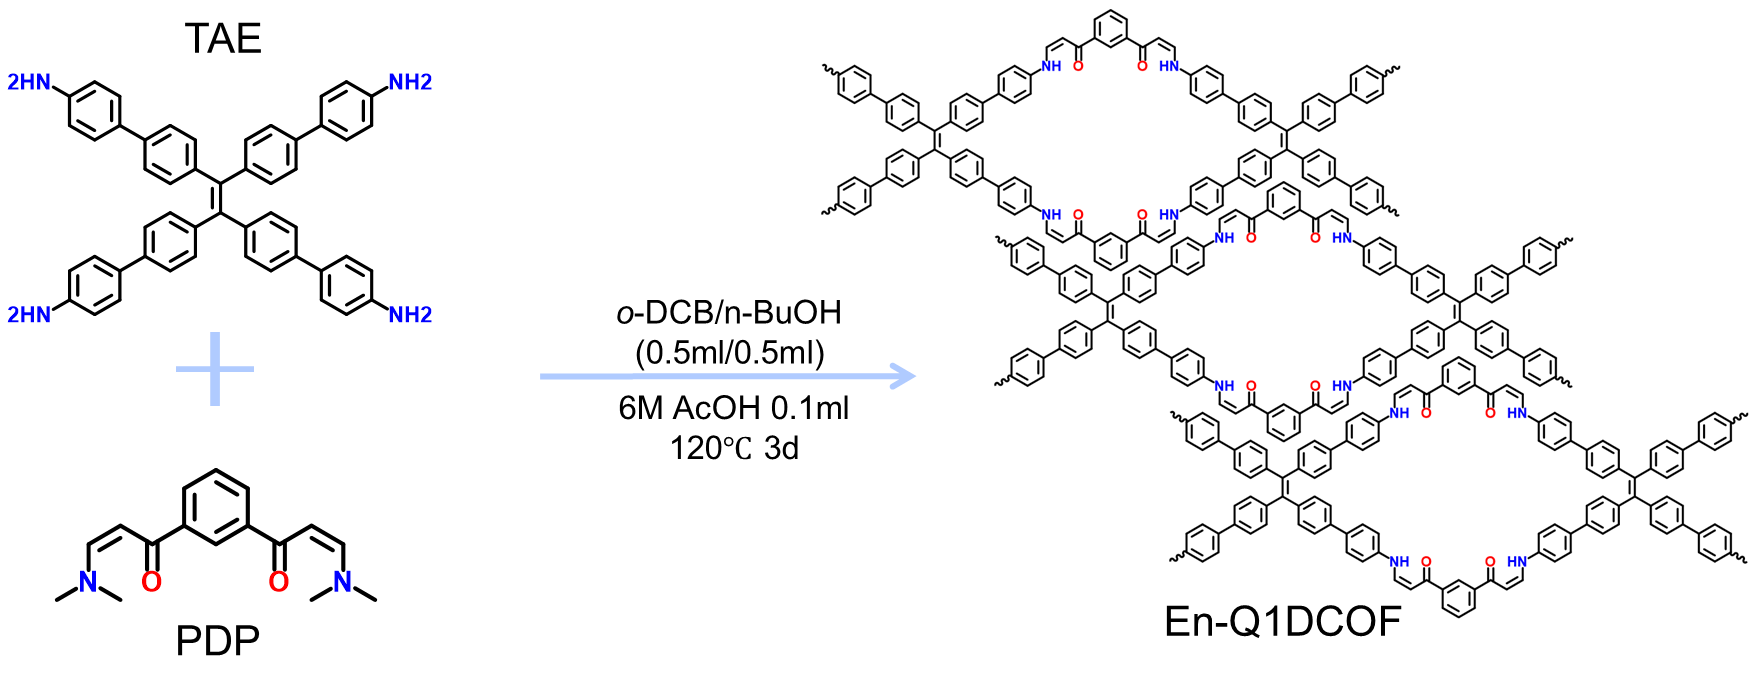


**Figure S5.** Synthesis of En-Q1DCOF.


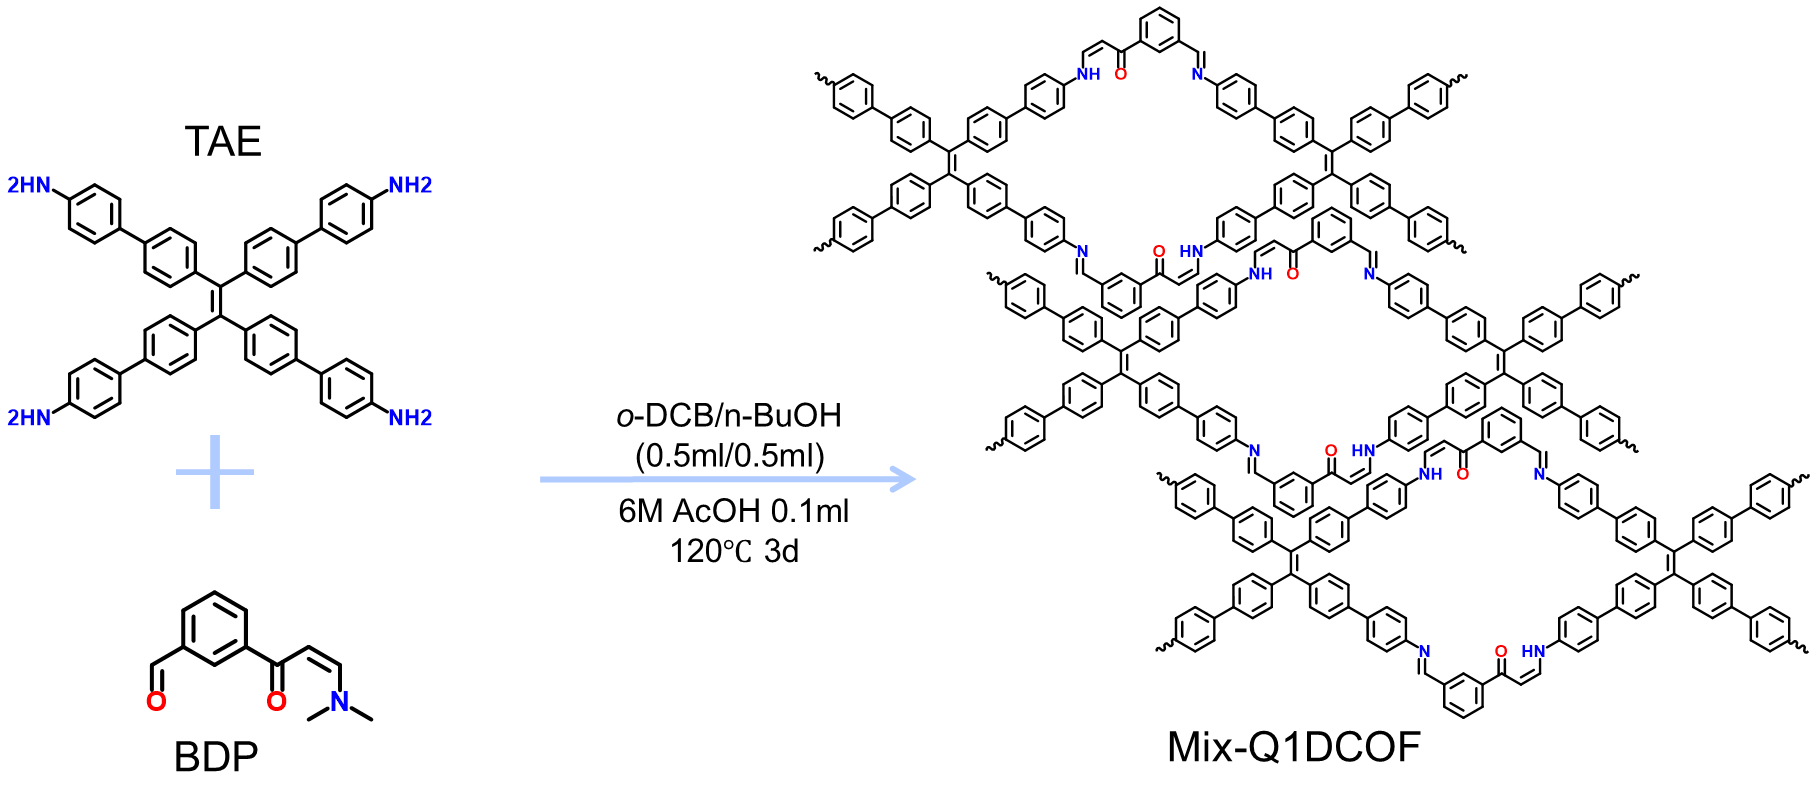


**Figure S6.** Synthesis of Mix-Q1DCOF.


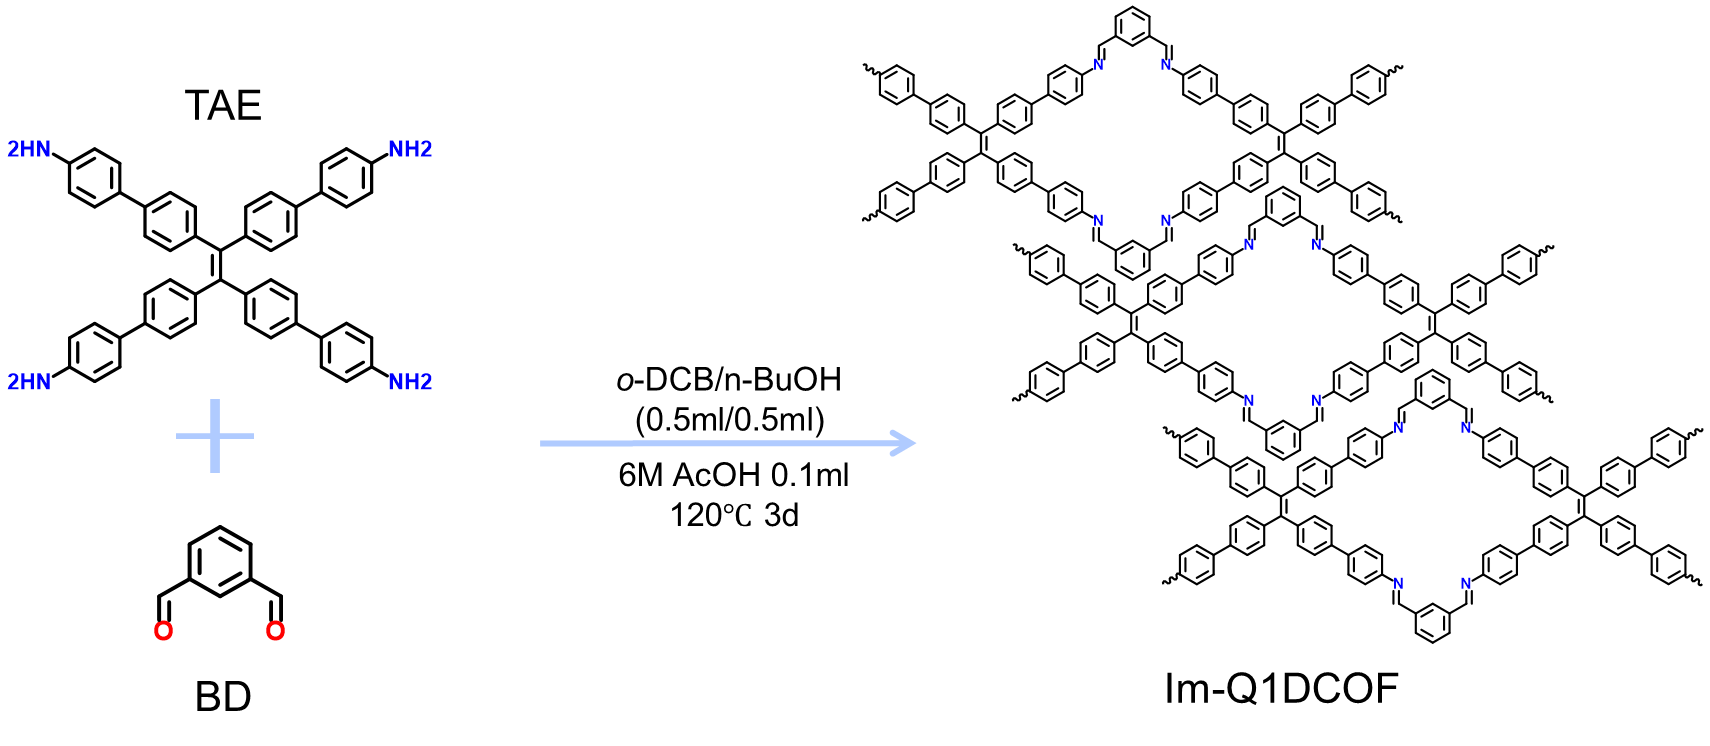


**Figure S7.** Synthesis of Im-Q1DCOF.


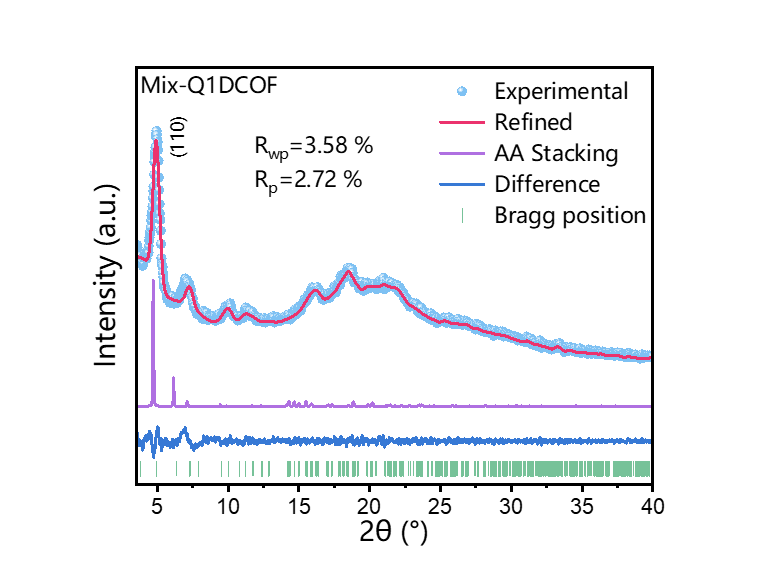


**Figure S8.** Experimental and Pawley refined PXRD of Mix-Q1DCOF crystal structure on the basis of the AA stacking models.


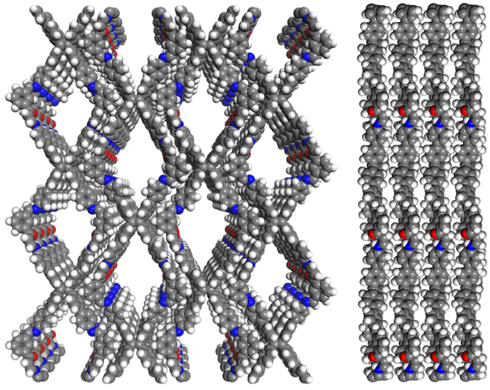


**Figure S9.** Mix-Q1DCOF top view and side view of the AA stacking structure based on PXRD and modeling.


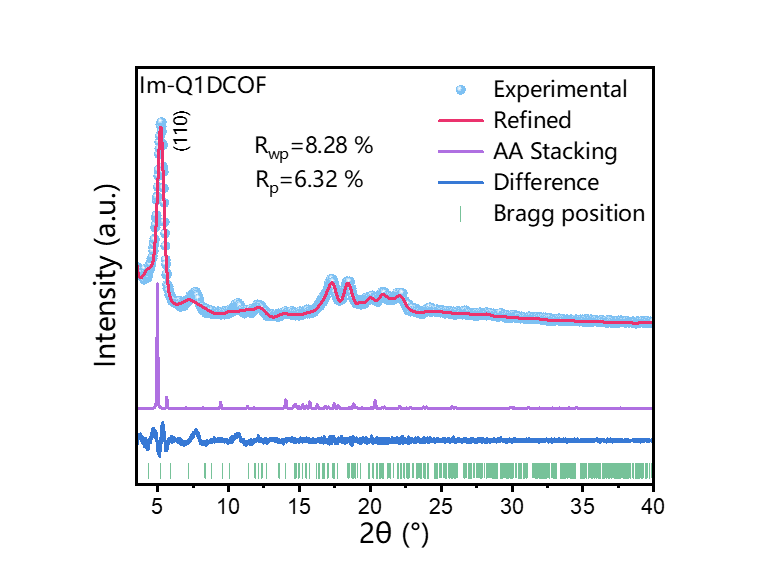


**Figure S10.** Experimental and Pawley refined PXRD of Im-Q1DCOF crystal structure on the basis of the AA stacking models.


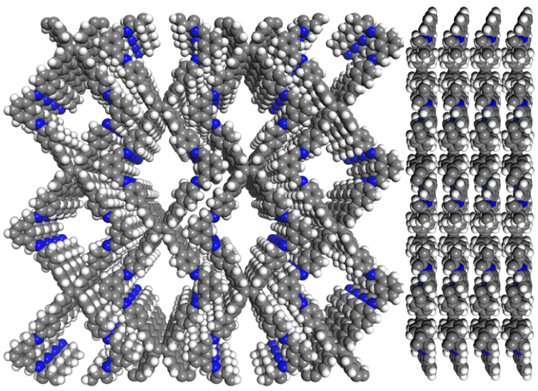


**Figure S11.** Im-Q1DCOF top view and side view of the AA stacking structure based on PXRD and modeling.


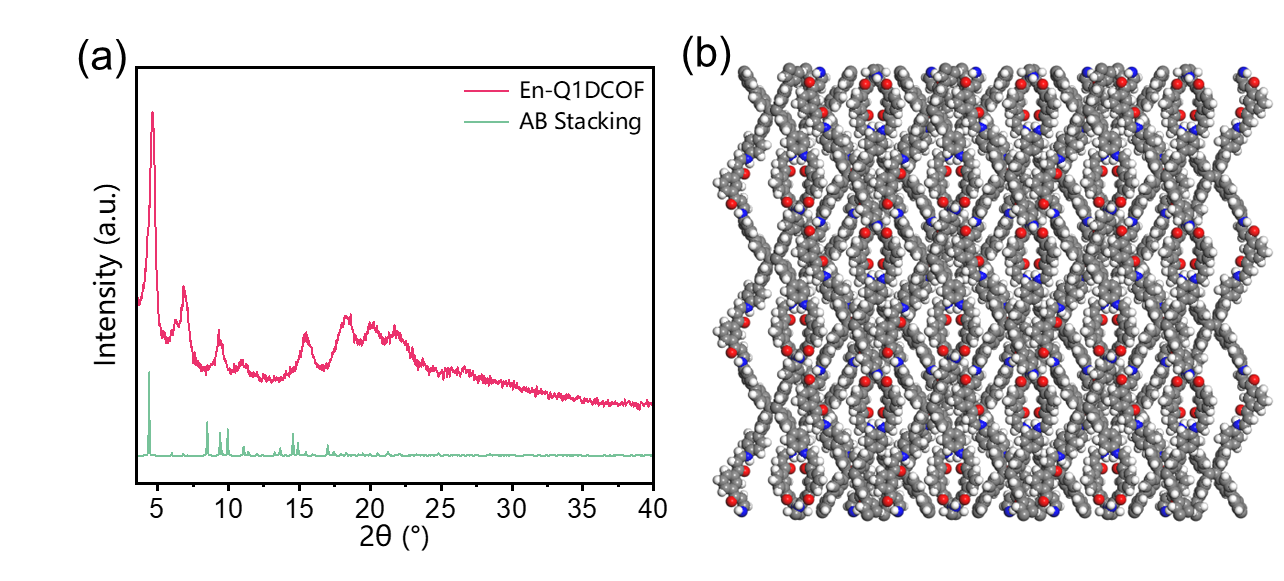


**Figure S12.** (a) Experimental and simulated powder X-ray diffraction patterns (AB stacking) and (b) ideal structure of En-Q1DCOF.


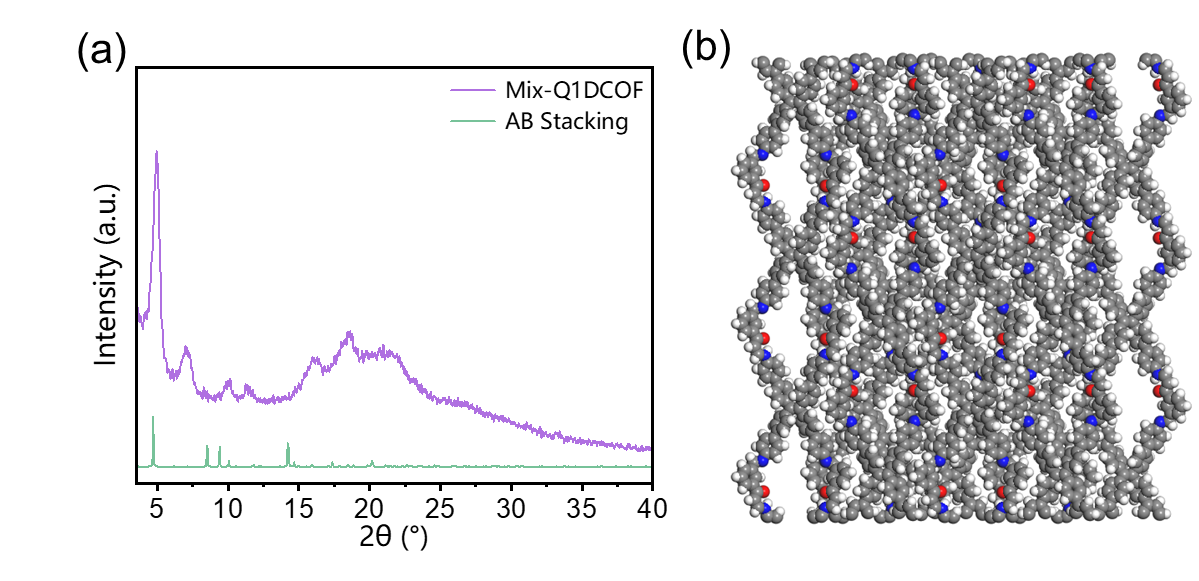


**Figure S13.** (a) Experimental and simulated powder X-ray diffraction patterns (AB stacking) and (b) ideal structure of Mix-Q1DCOF.


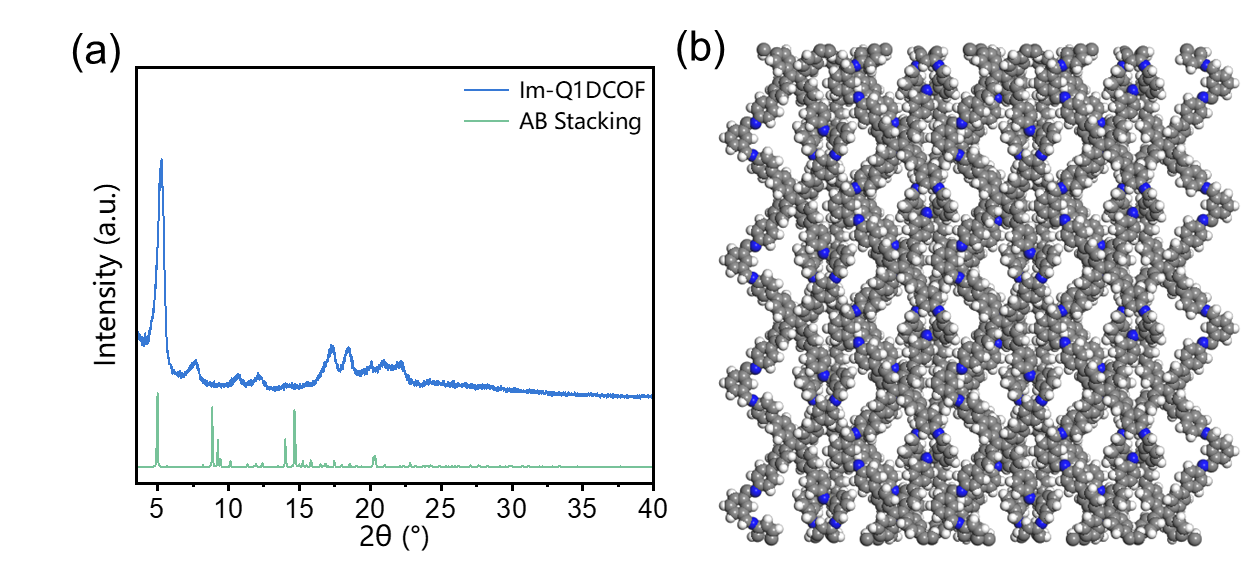


**Figure S14.** (a) Experimental and simulated powder X-ray diffraction patterns (AB stacking) and (b) ideal structure of Im-Q1DCOF.


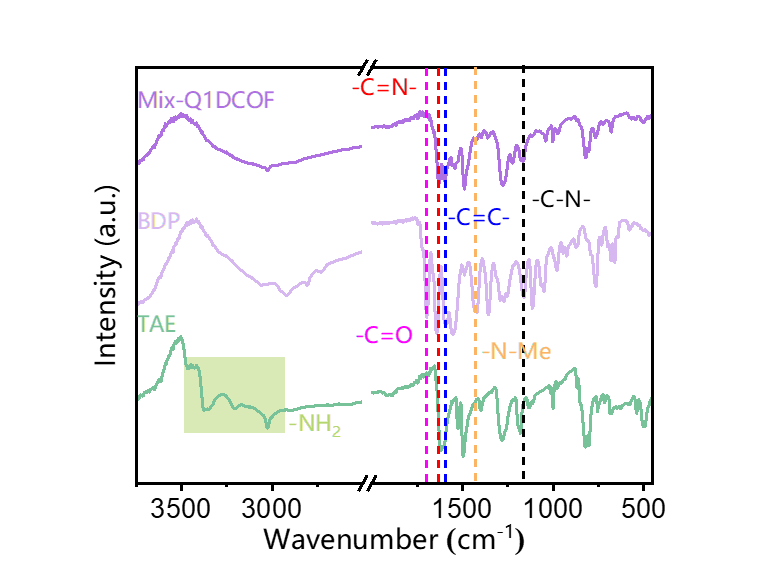


**Figure S15.** Comparison of the FTIR spectra of Mix-Q1DCOF.


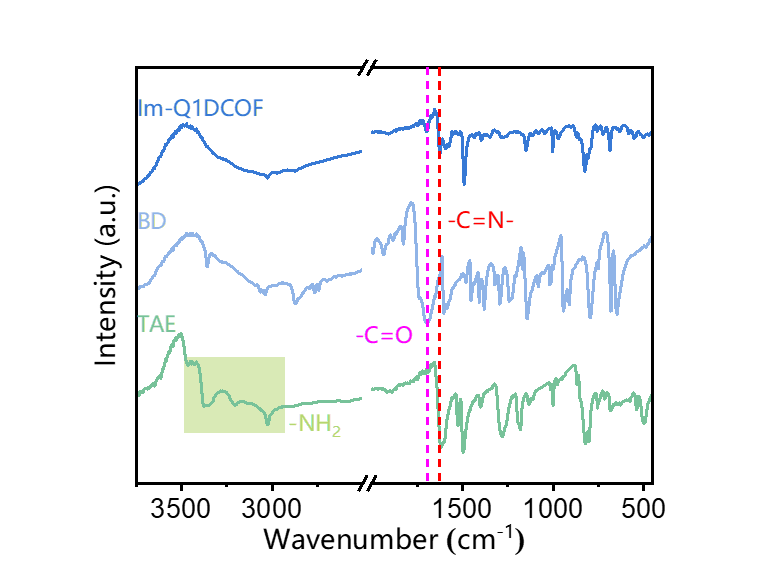


**Figure S16.** Comparison of the FTIR spectra of Im-Q1DCOF.

**Figure S17.** Comparison of the FTIR spectra of Q1DCOFs.

**Figure S18.** The 13C CP/MAS spectra of Mix-Q1DCOF.

**
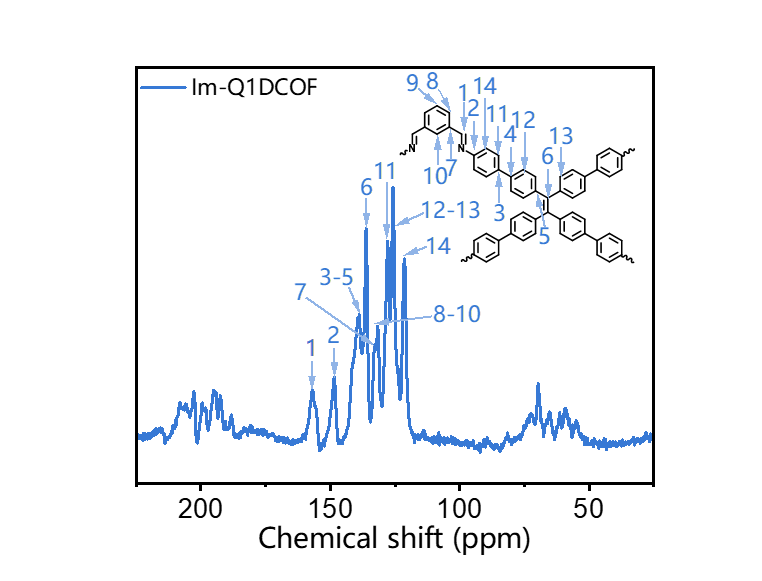
**

**Figure S19.** The 13C CP/MAS spectra of Im-Q1DCOF.

**
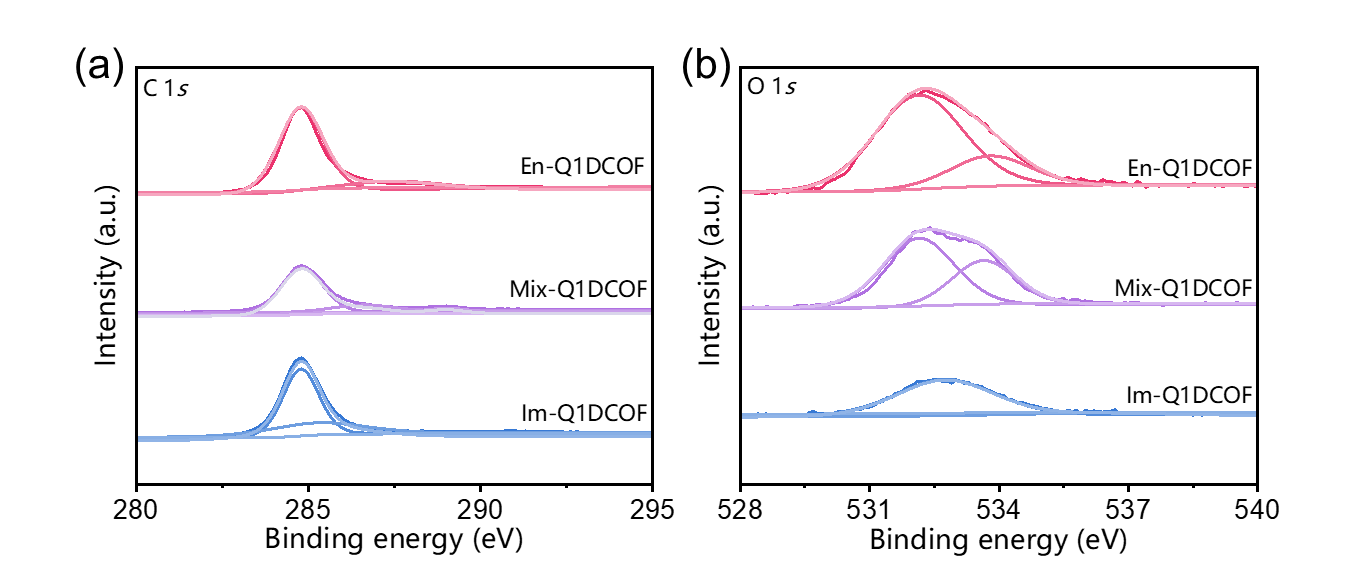
**

**Figure S20.** High-resolution XPS spectra of (a) C 1*s* and (b) O 1*s*.

**
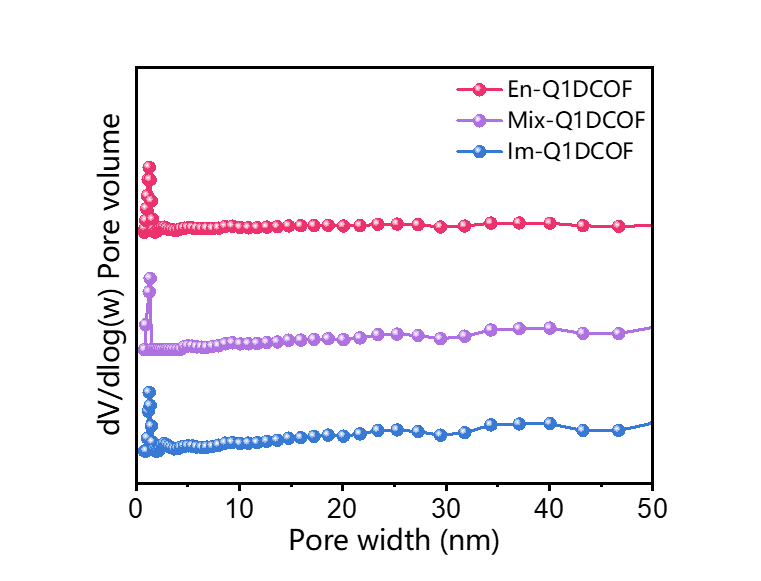
**

**Figure S21.** The pore-size distribution of Q1D-COFs.


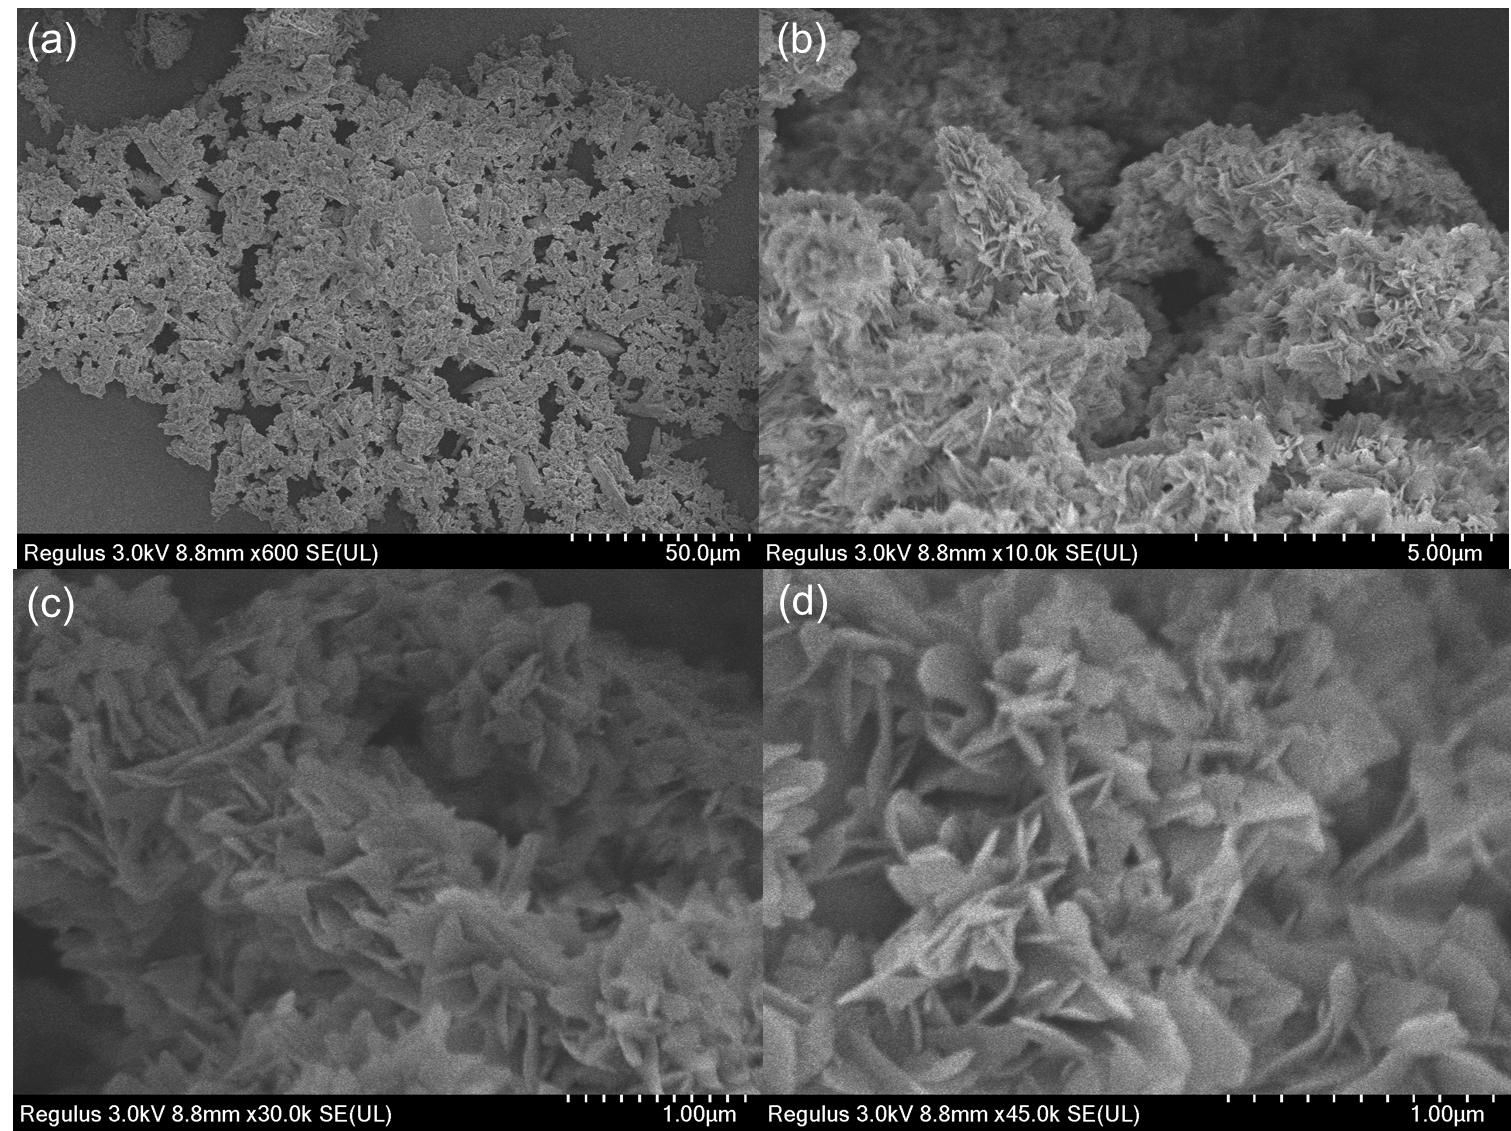


**Figure S22.** SEM images of En-Q1DCOF.


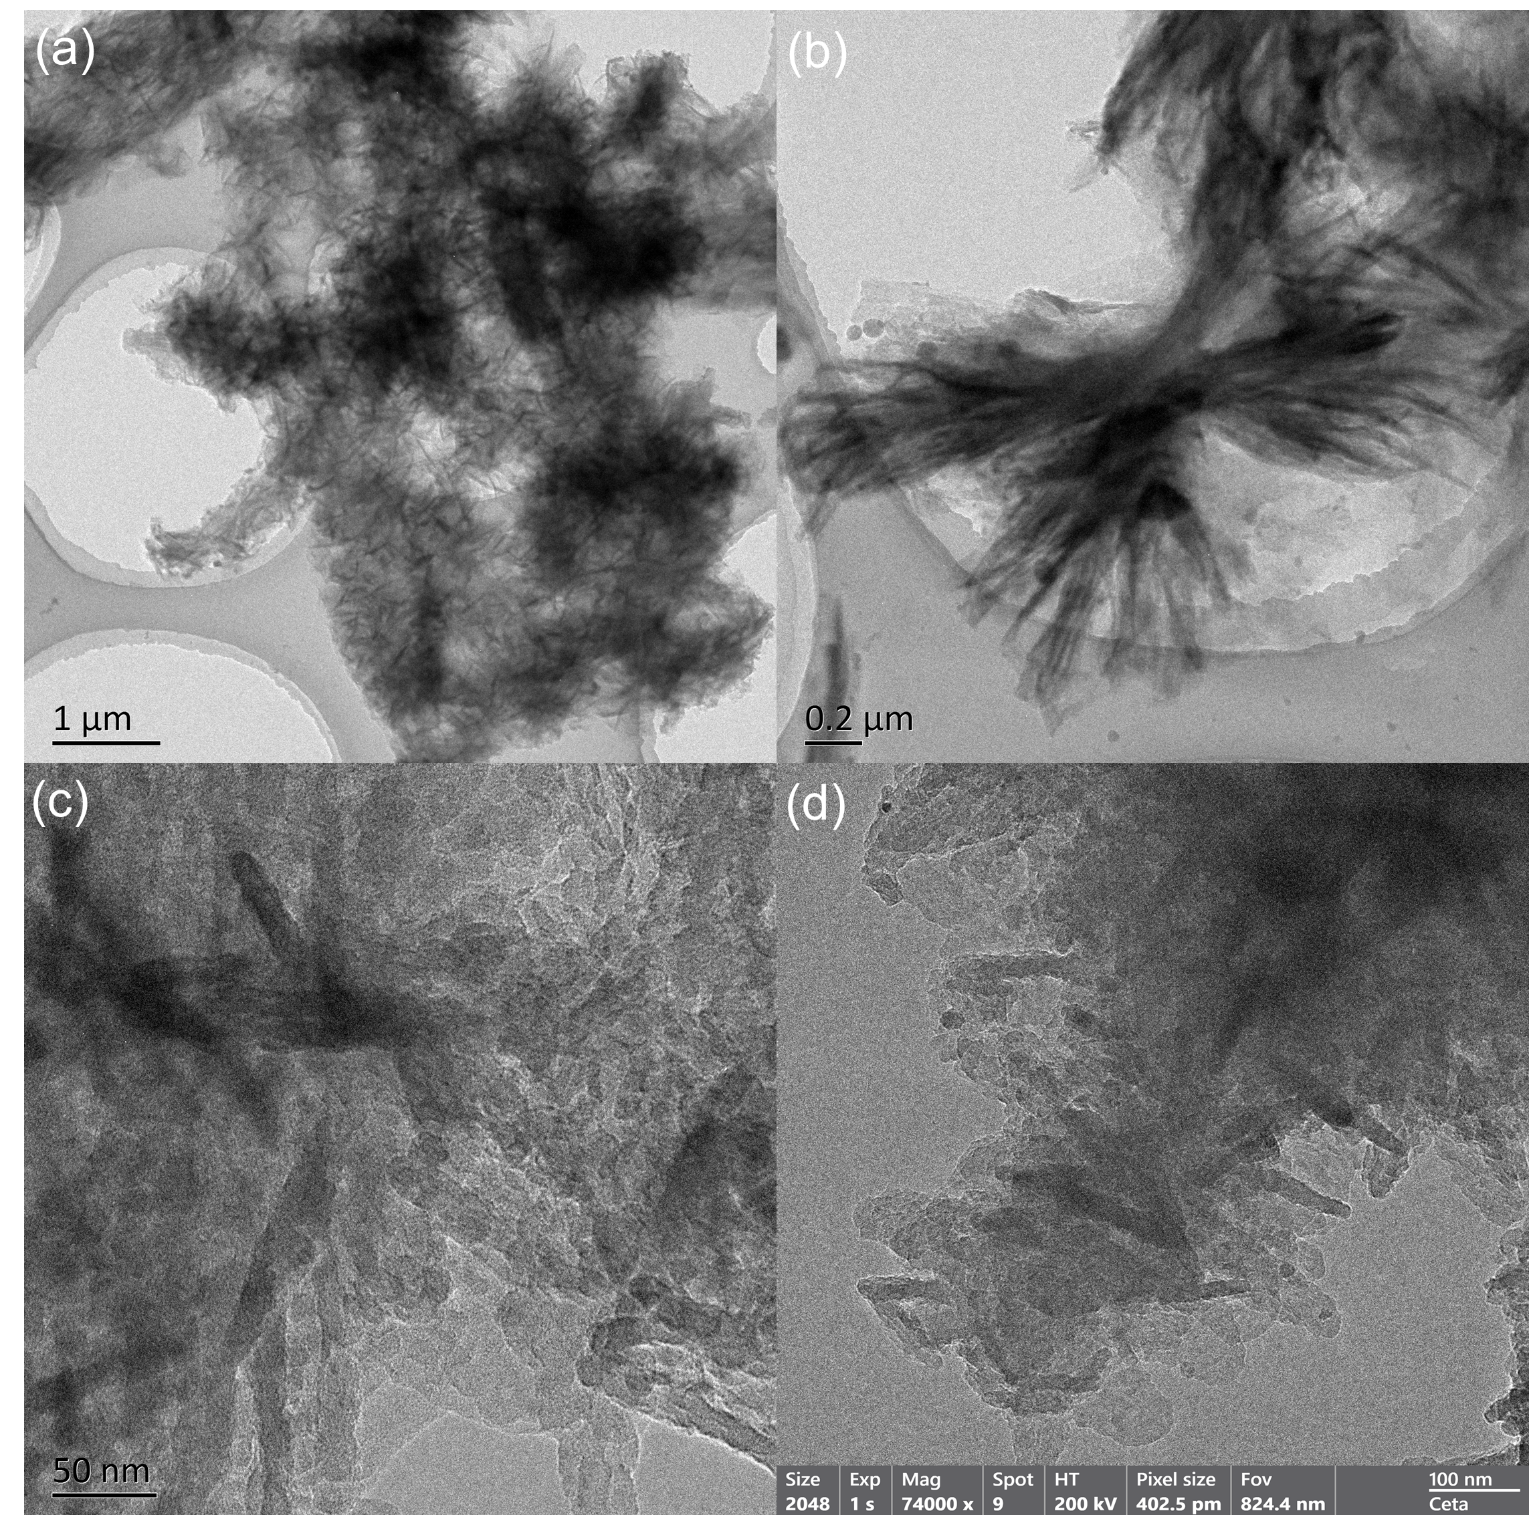


**Figure S23.** TEM images of En-Q1DCOF.


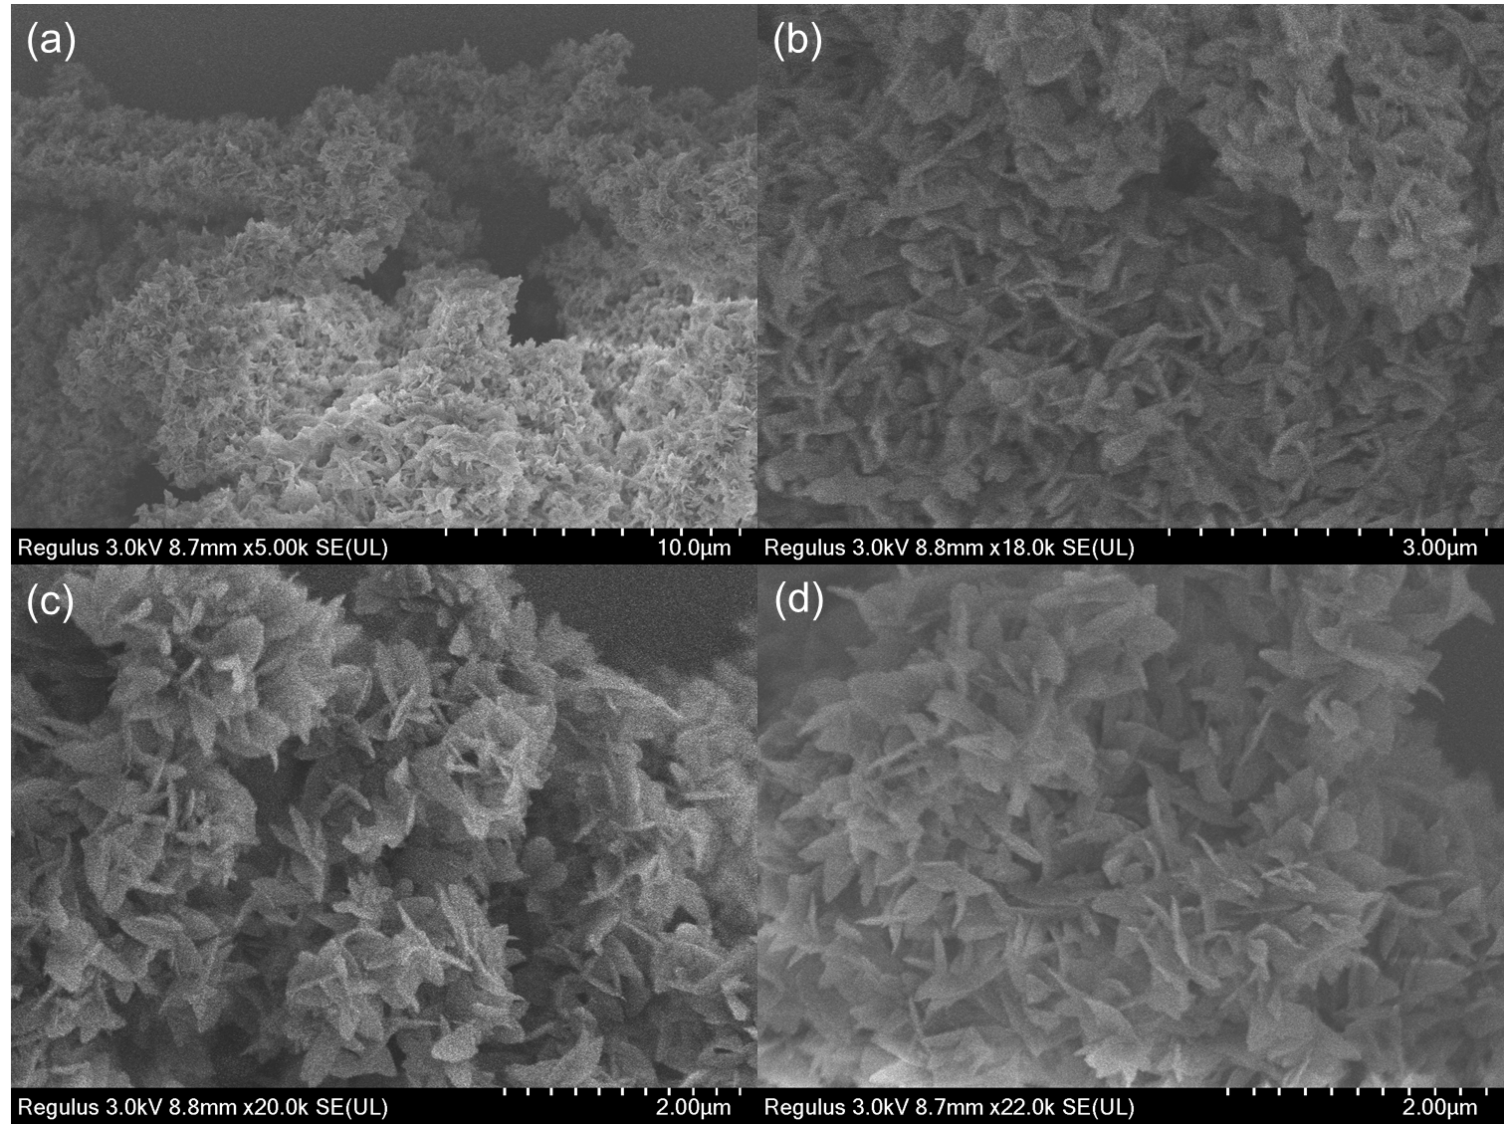


**Figure S24.** SEM images of Mix-Q1DCOF.


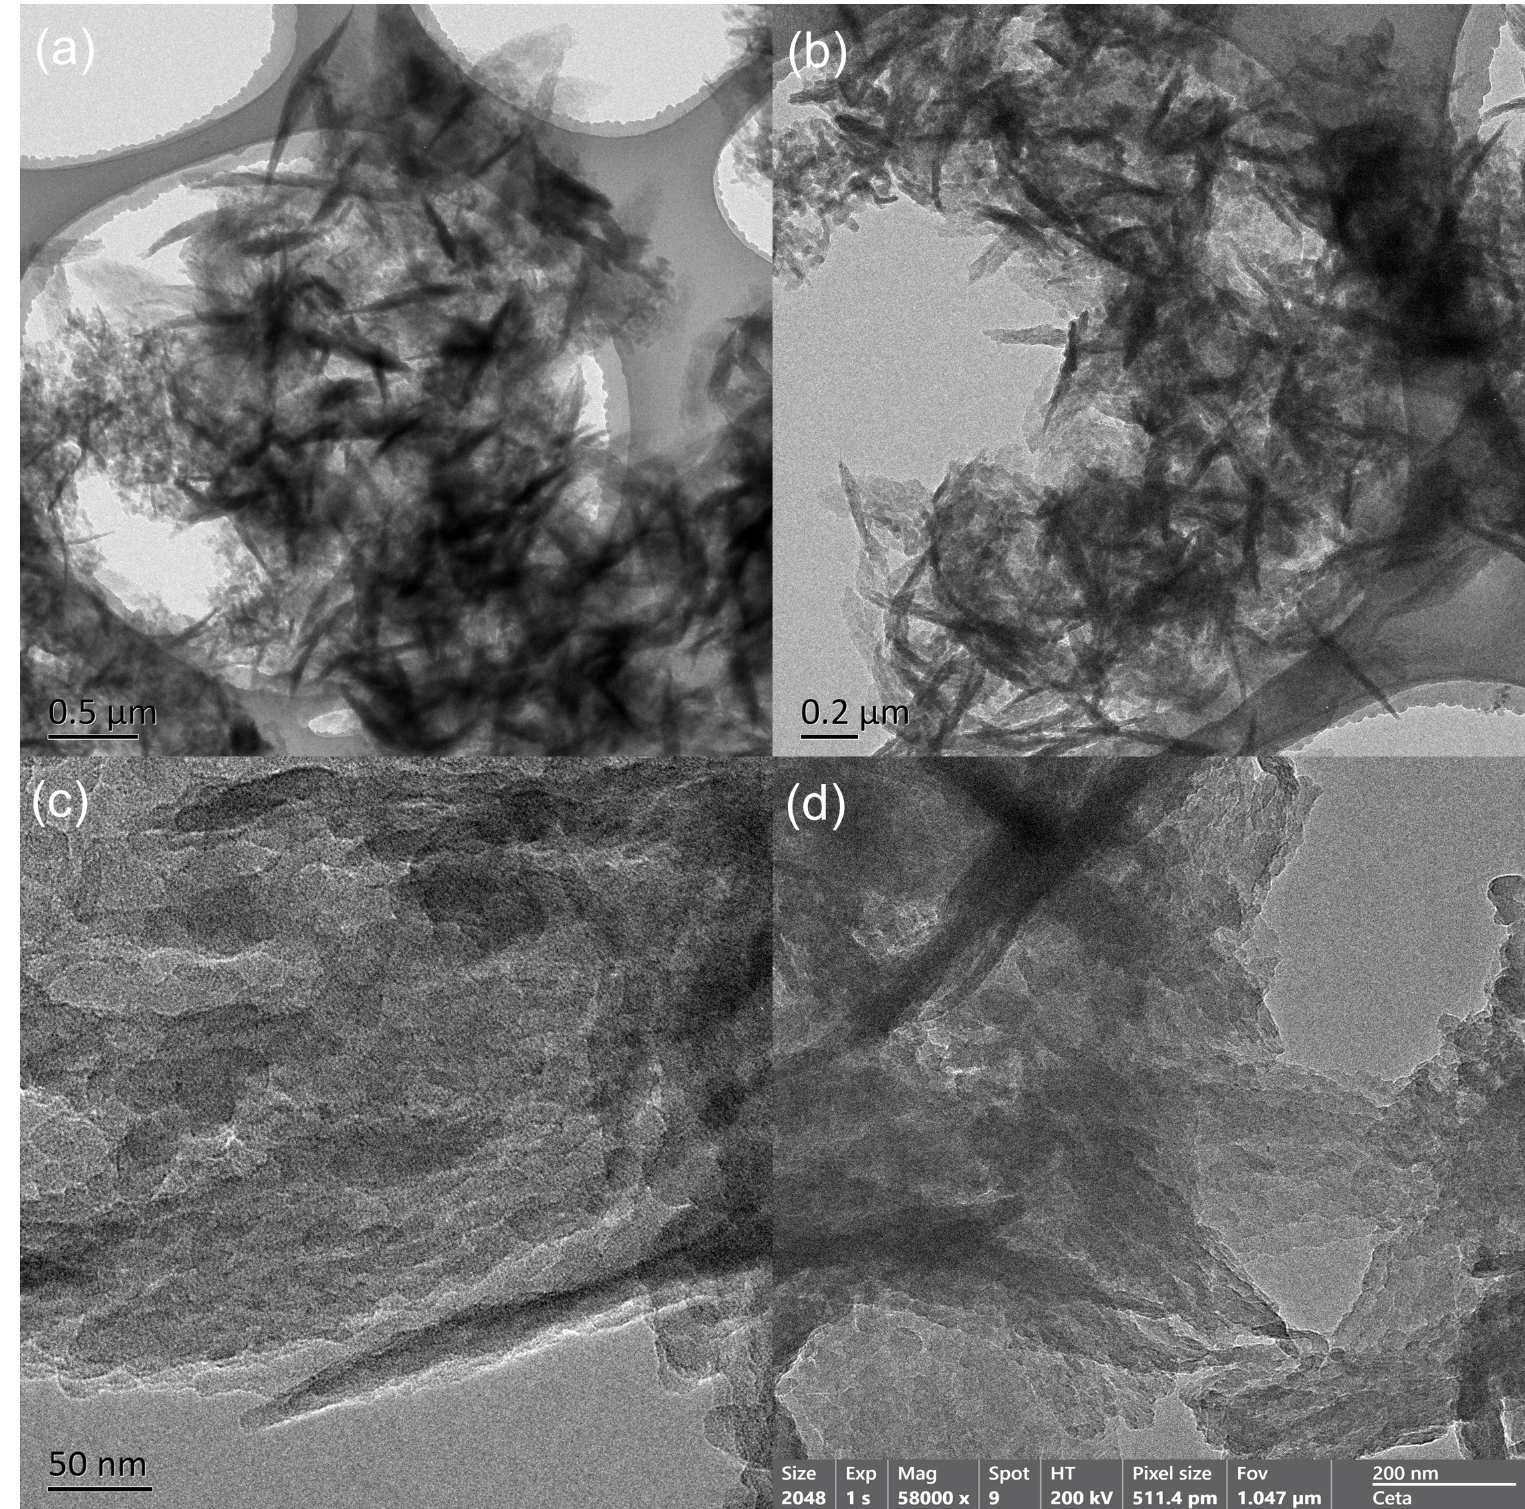


**Figure S25.** TEM images of Mix-Q1DCOF.


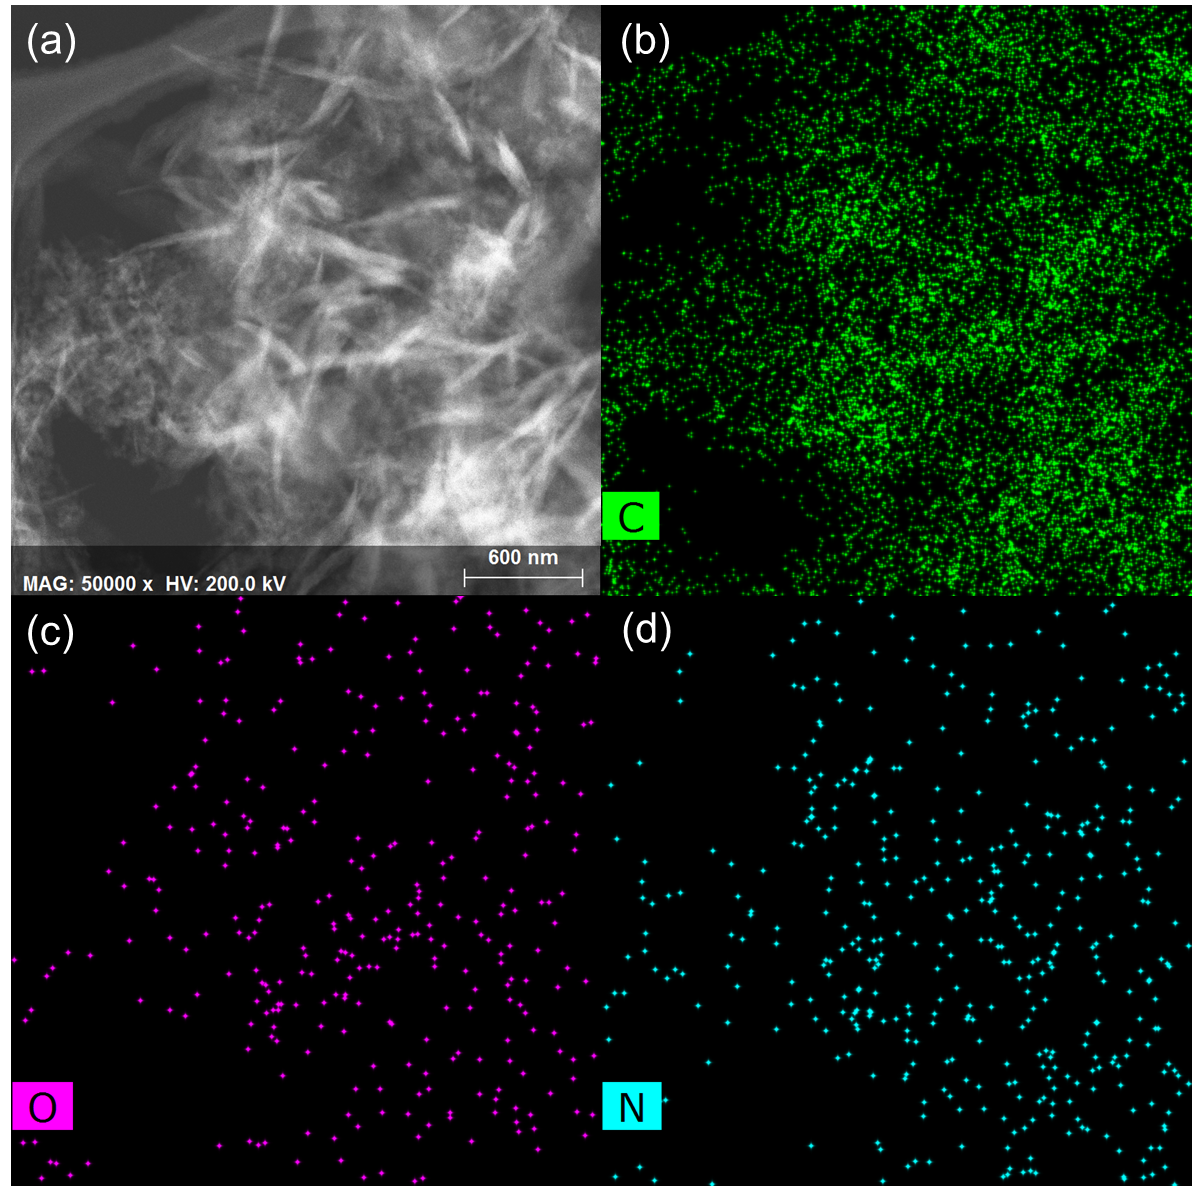


**Figure S26.** Elemental mapping images of Mix-Q1DCOF.


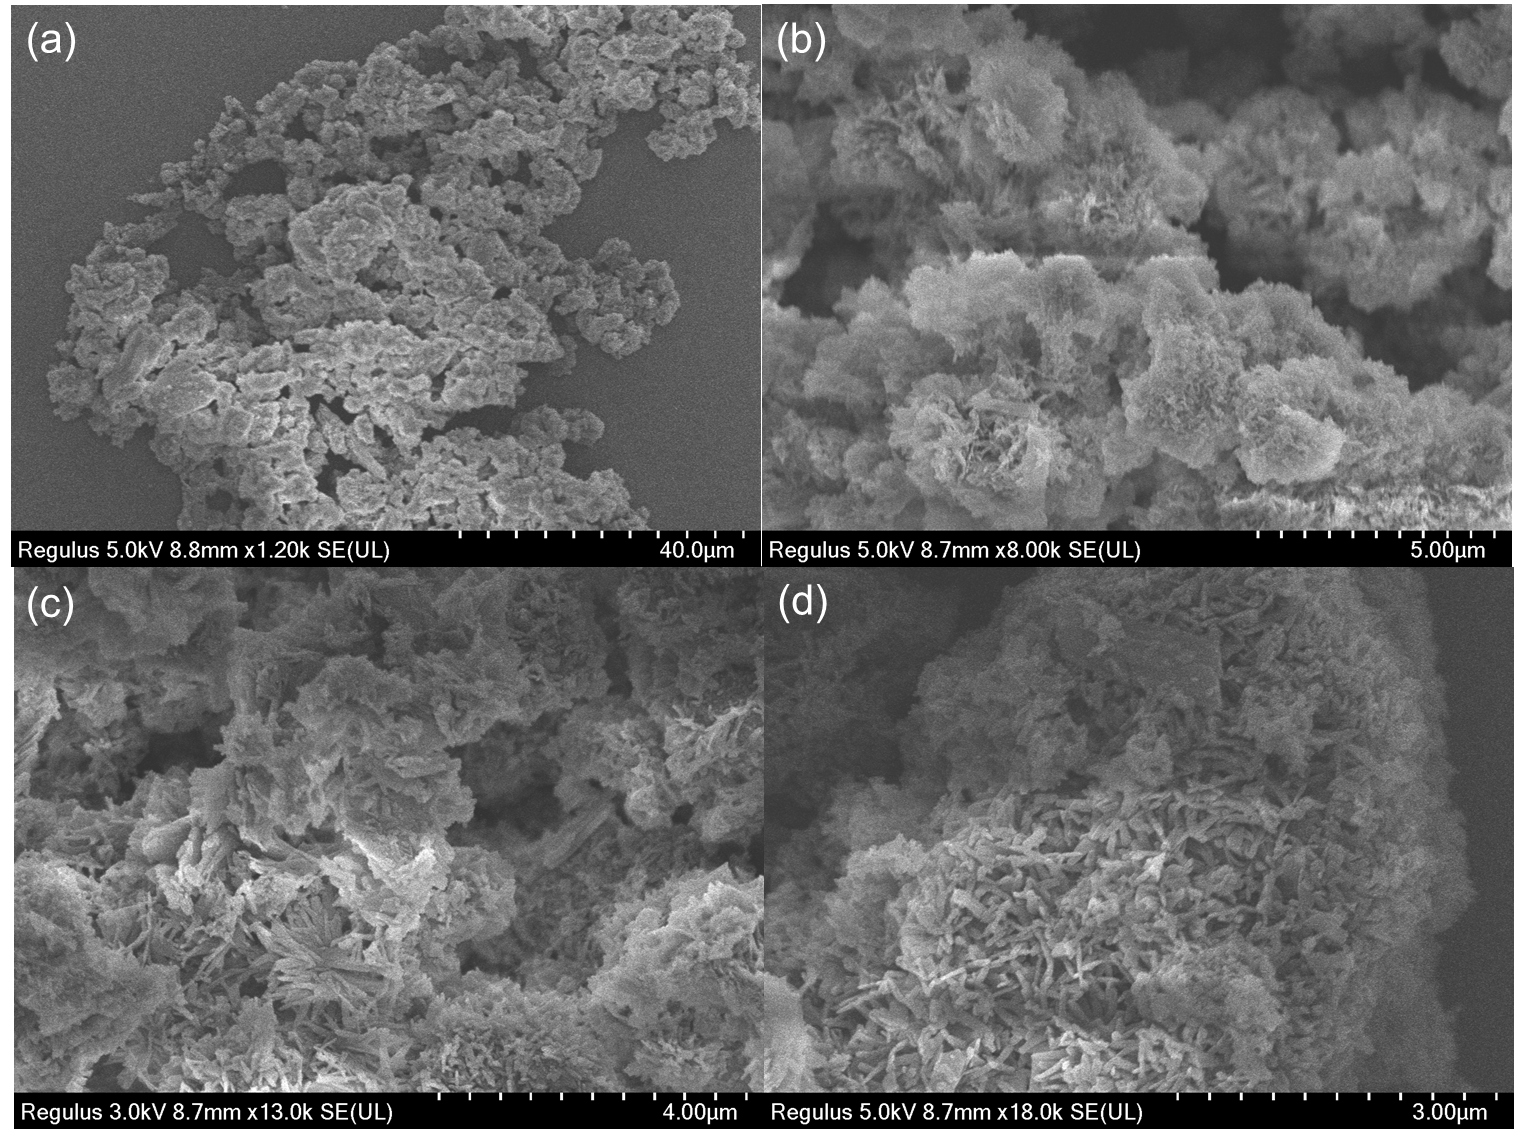


**Figure S27.** SEM images of Im-Q1DCOF.


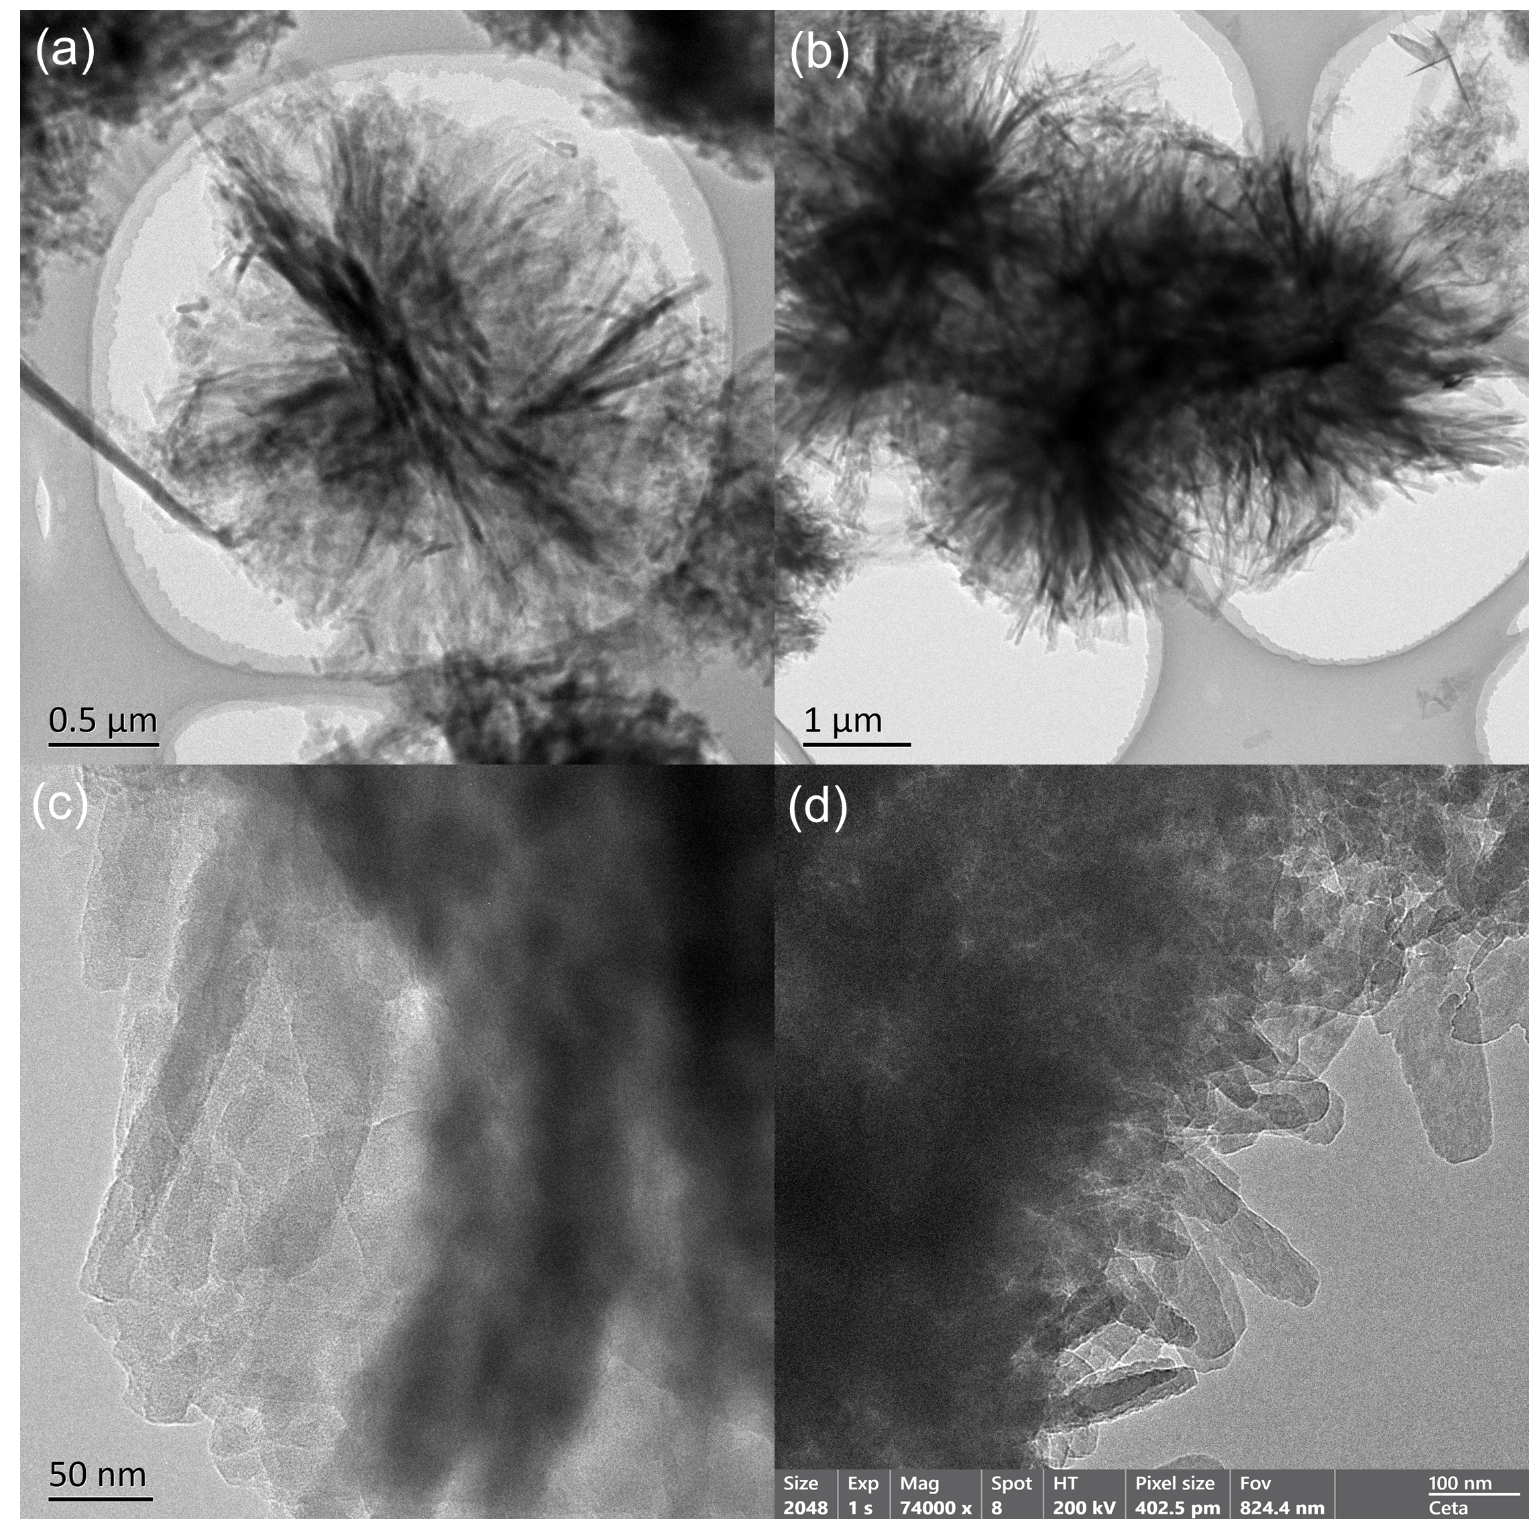


**Figure S28.** TEM images of Im-Q1DCOF.


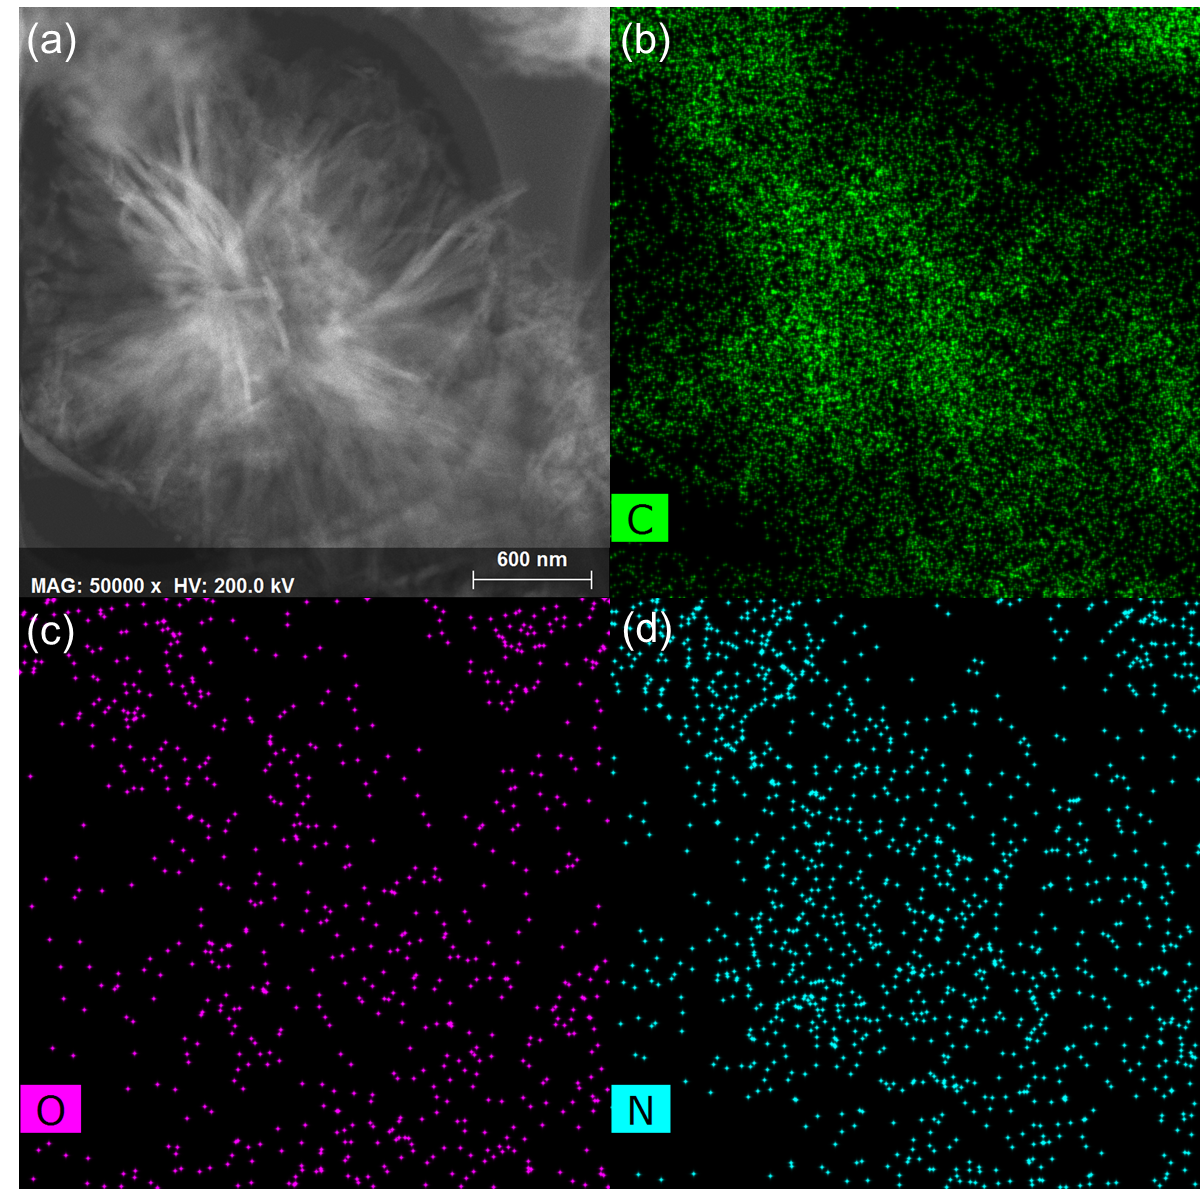


**Figure S29.** Elemental mapping images of Im-Q1DCOF.


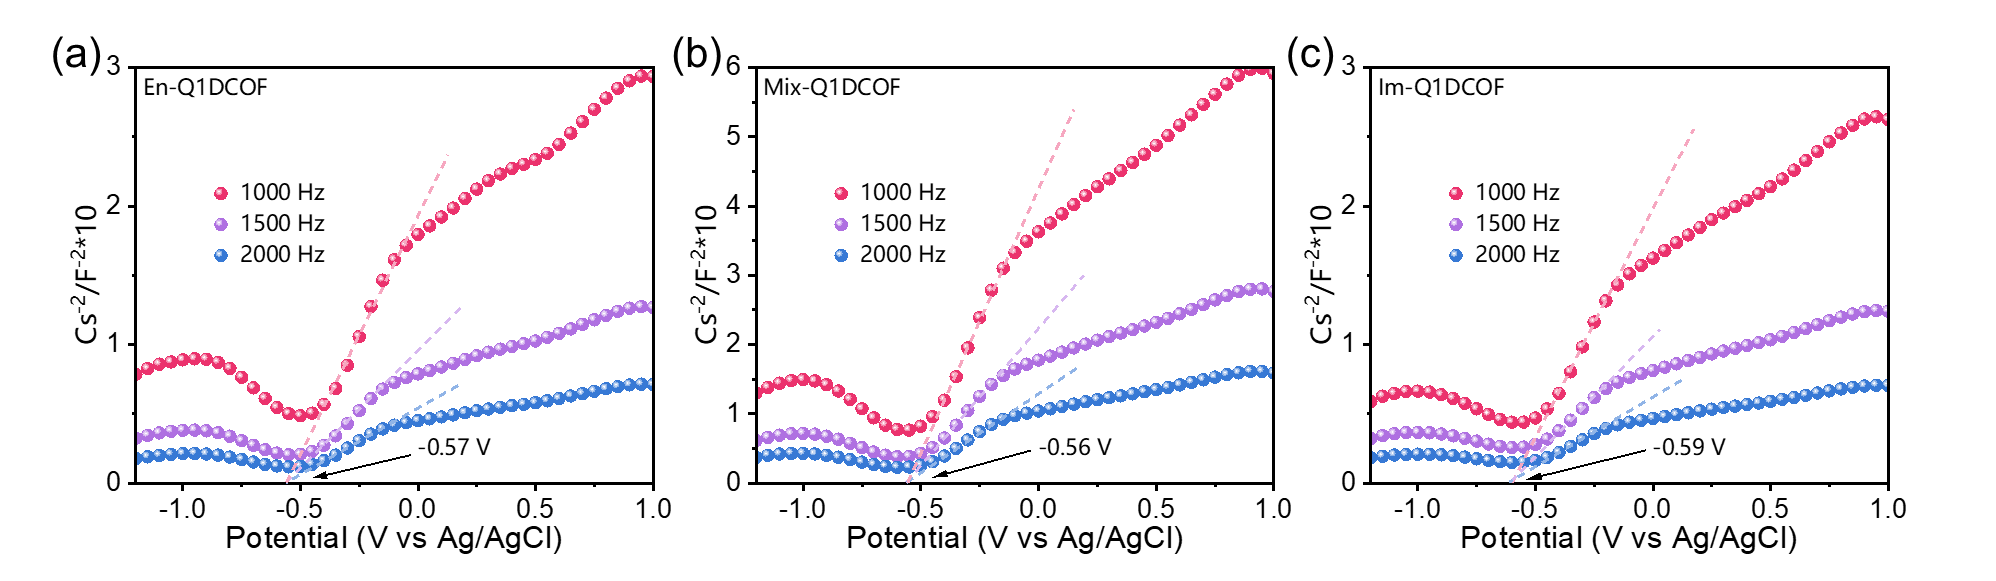
**Figure S30.** Mott-Schottky plots of (a) En-Q1DCOF, (b) Mix-Q1DCOF and (c) Im-Q1DCOF.


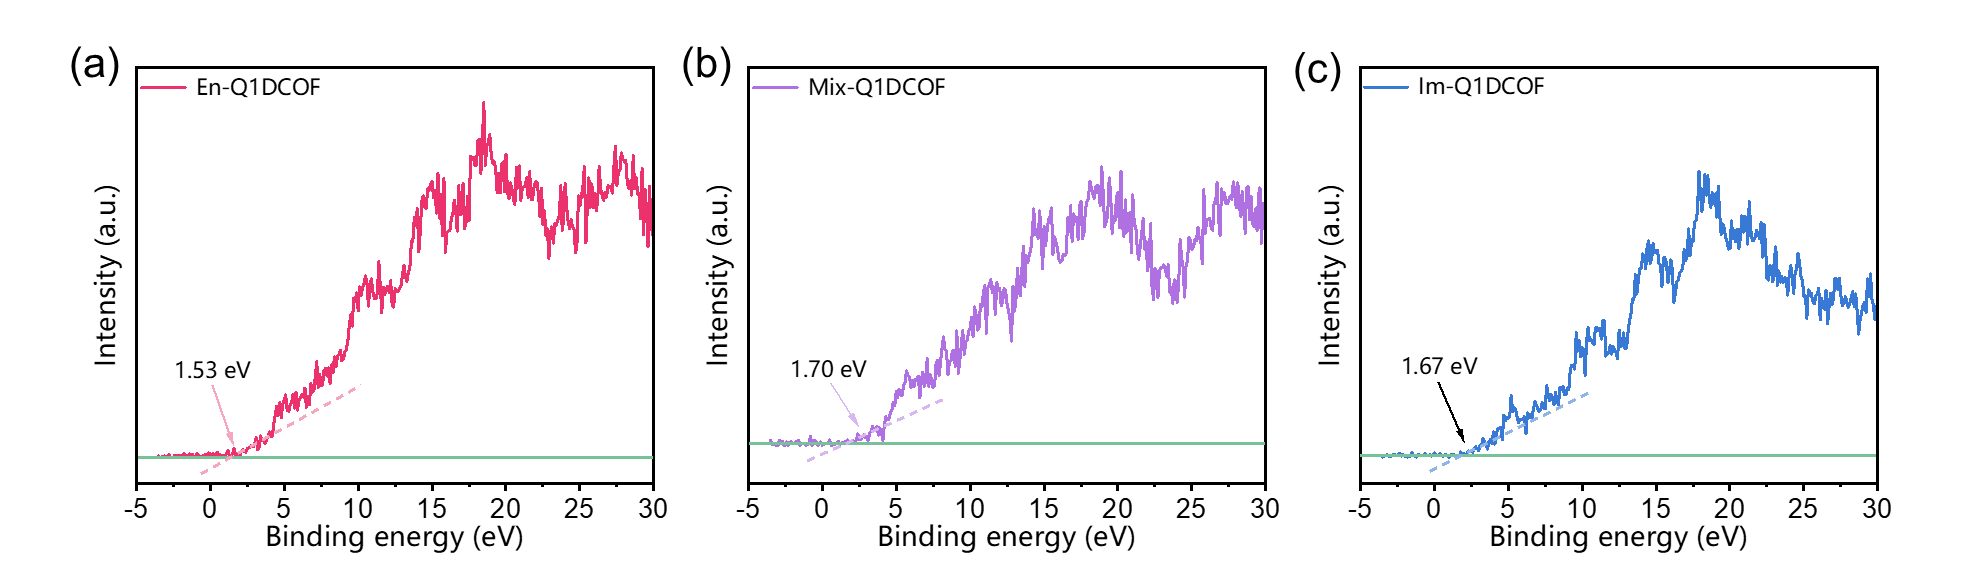


**Figure S31.** Valence band XPS spectra of (a) En-Q1DCOF, (b) Mix-Q1DCOF and (c) Im-Q1DCOF.


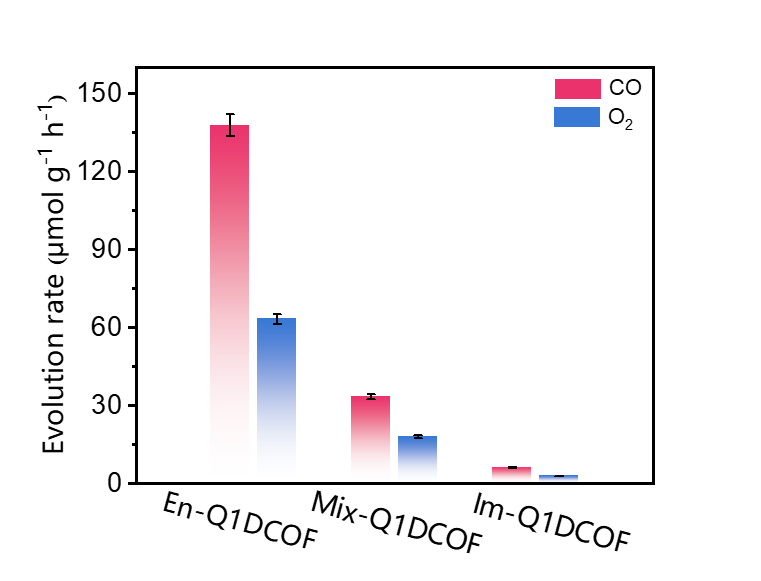


**Figure S32.** CO and O2 evolution rates of En-Q1DCOF, Mix-Q1DCOF and Im-Q1DCOF.


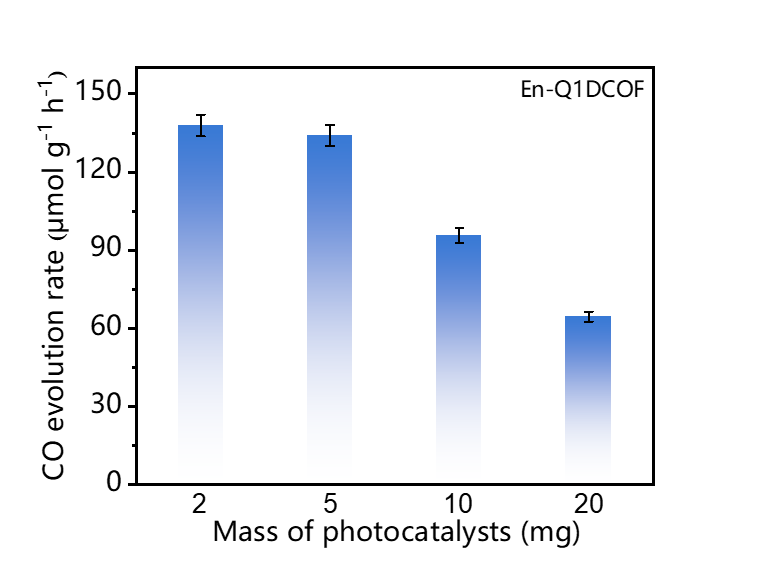


**Figure S33.** Dependence of the CO evolution rate for En-Q1DCOF with different masses.

**
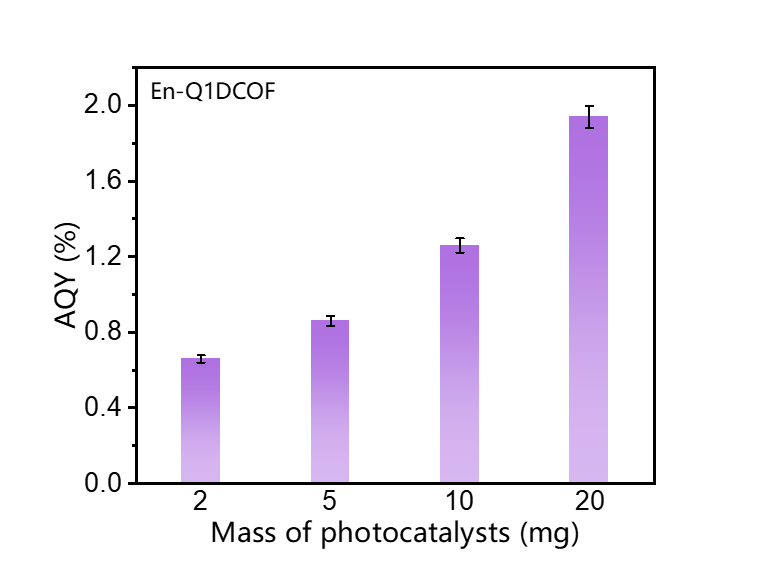
**

**Figure S34.** Mass‐dependent AQY of photocatalytic CO evolution for En-Q1DCOF.


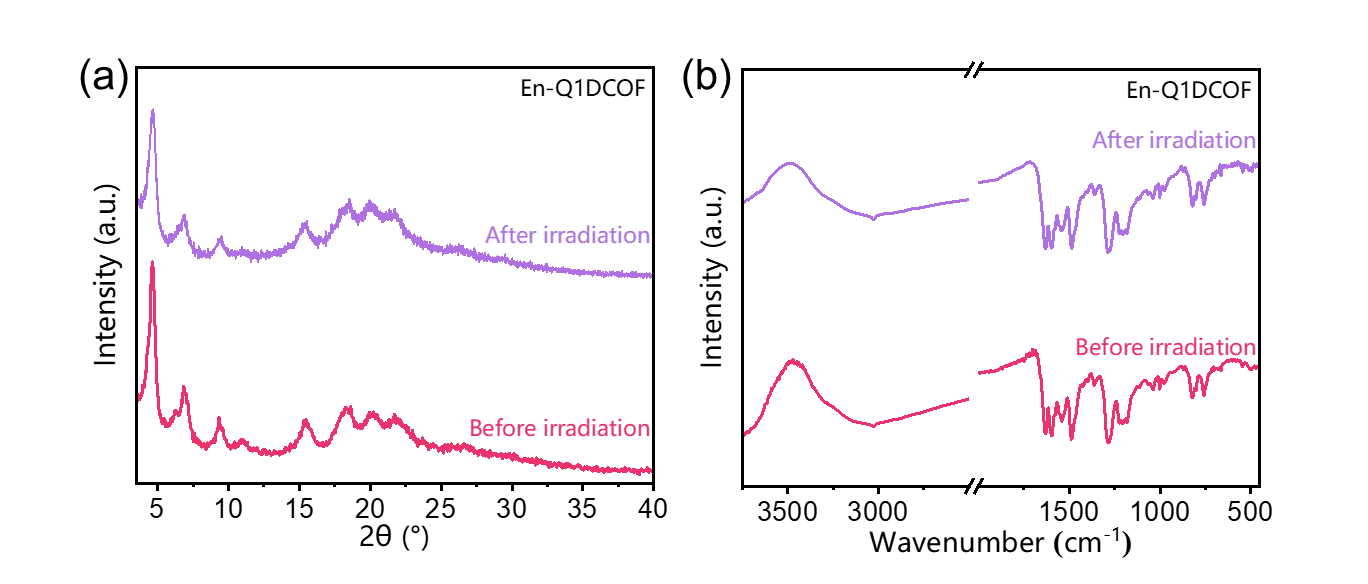


**Figure S35.** (a) PXRD patterns of En-Q1DCOF before and after photocatalytic reaction. (b) FTIR spectra of En-Q1DCOF before and after photocatalytic reaction.


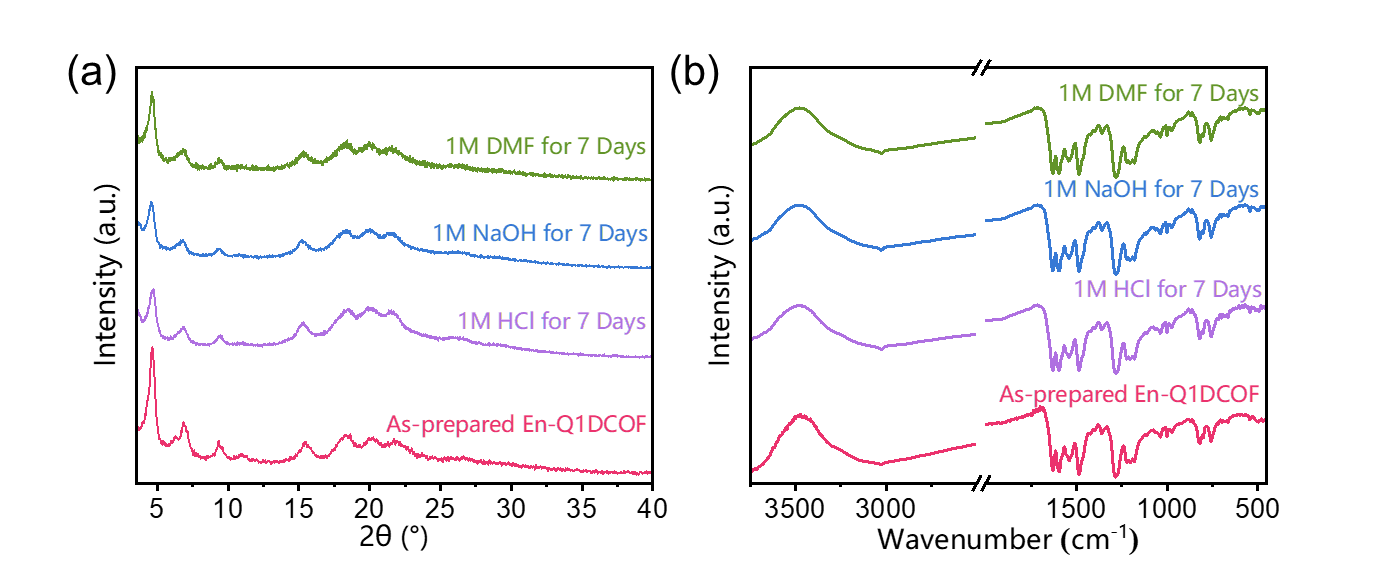


**Figure S36.** Chemical stability of En-Q1DCOF. (a) PXRD patterns and (b) FTIR spectra of En-Q1DCOF after treatment in 1M NaOH, 1M HCl or 1M DMF for 7 days.


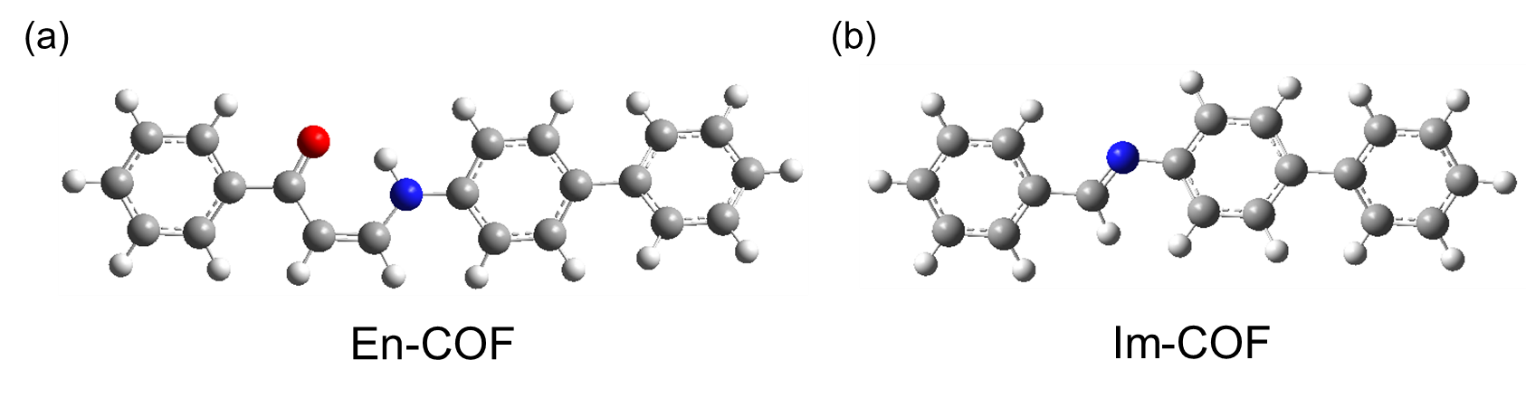


**Figure S37.** (a)En-COF and (b) Im-COF used for the calculation of the minimal fragment (Grey for C atoms, white for H atoms, red for O atoms and blue for N atoms).


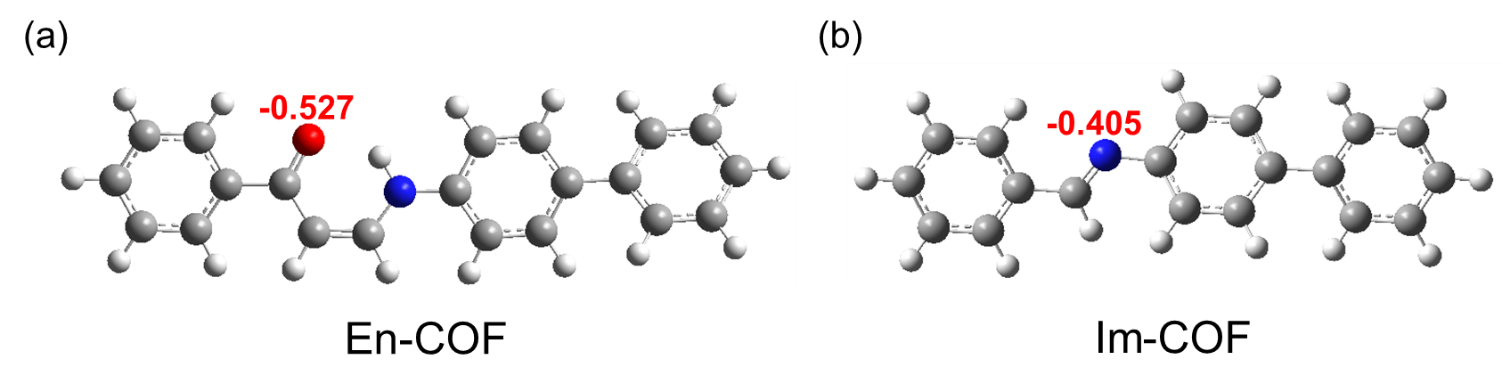


**Figure S38.** Charge of CO2 adsorption sites in (a O-site) En-COF and (b N-site) Im-COF.


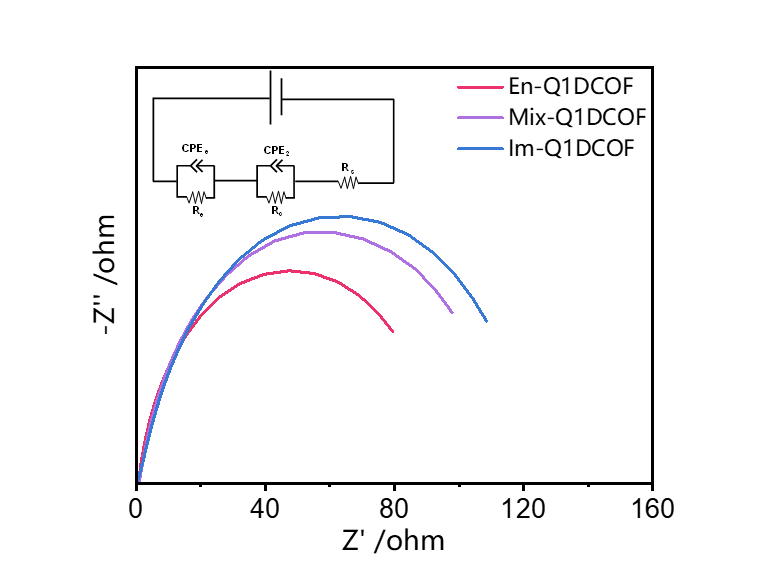


**Figure S39.** EIS Nyquist plots, with an inset showing the electrical equivalent circuit of the Nyquist plots.


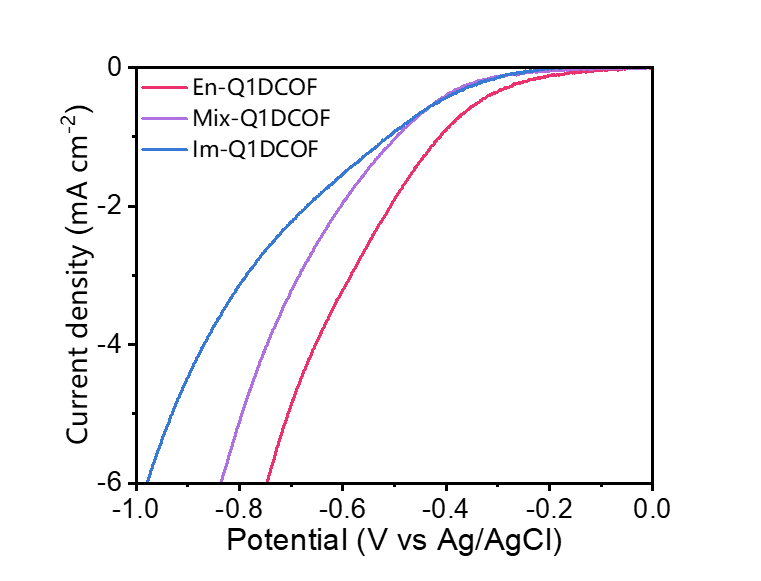


**Figure S40.** Polarization curves.


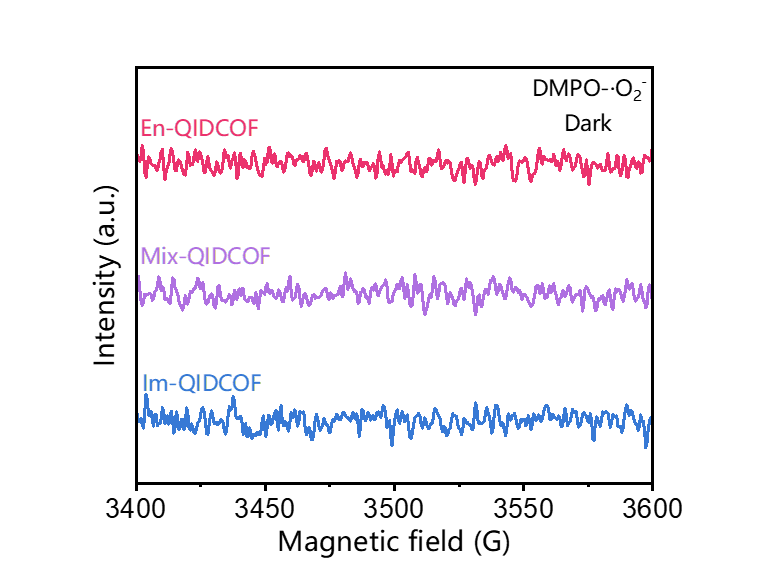


**Figure S41.** Electron paramagnetic resonance spectra of DMPO‐•O2- of the samples in dark.

**
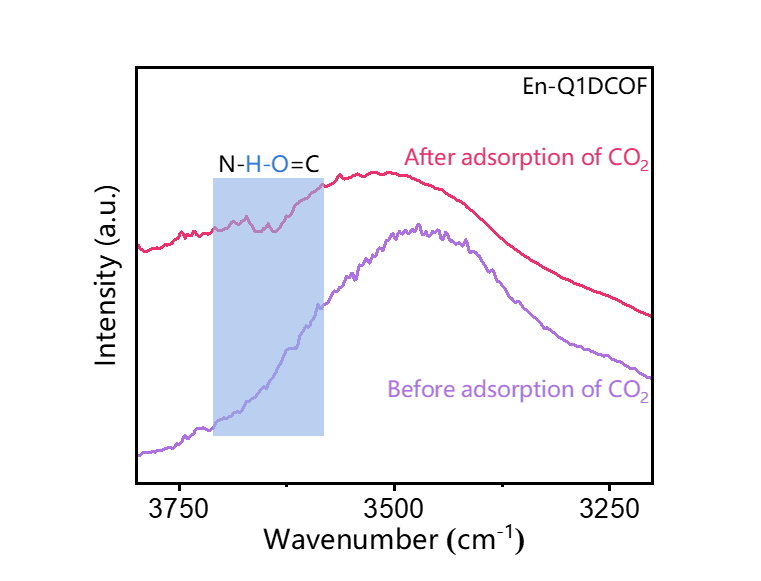
**

**Figure S42.** *In situ* ATR FTIR spectra of dry CO2 interactions with En-Q1DCOF under dark.

**
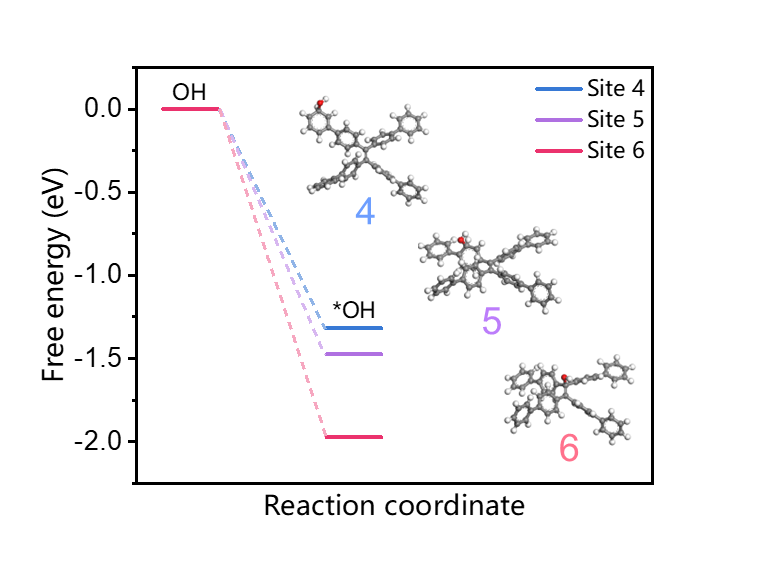
**

**Figure S43.** Gibbs free energy at different OH adsorption sites of Q1DCOFs.

**Table S1.** Fractional atomic coordinates for the unit cell of En-Q1DCOF with AA stacking.

| **Space group PMA2** |  |  |  |
| --- | --- | --- | --- |
| **Calculated cell parameters** |  |  |  |
|  | **a=29.4992Å** | **b= 27.3954Å** | **c= 6.0908Å** |
|  | **α= 90.0000°** | **β= 90.0000°** | **γ= 90.0000°** |
|  | **Rp= 2.96%** | **Rwp=3.83%** |  |
| **Atom** | **x** | **y** | **z** |
| **C1** | -0.97577 | 0.1005 | 0.25335 |
| **O2** | -0.96888 | 0.07597 | 0.42419 |
| **C3** | -0.96696 | 0.07988 | 0.04508 |
| **C4** | -0.94802 | 0.0338 | 0.00095 |
| **N5** | -0.93293 | 0.00294 | 0.15887 |
| **C6** | -0.91403 | -0.04187 | 0.1328 |
| **C7** | -0.88857 | -0.06064 | 0.30983 |
| **C8** | -0.86675 | -0.10622 | 0.29411 |
| **C9** | -0.87018 | -0.135 | 0.10166 |
| **C10** | -0.89686 | -0.11643 | -0.07248 |
| **C11** | -0.9183 | -0.07076 | -0.05824 |
| **C12** | -0.84737 | -0.18034 | 0.08054 |
| **C13** | -0.84483 | -0.21418 | 0.25598 |
| **C14** | -0.82122 | -0.25857 | 0.2338 |
| **C15** | -0.79954 | -0.27068 | 0.03456 |
| **C16** | -0.80355 | -0.23815 | -0.14373 |
| **C17** | -0.82606 | -0.19335 | -0.11948 |
| **C18** | -1.3 | -0.64262 | -0.00566 |
| **C19** | -1.32267 | -0.63127 | -0.20352 |
| **C20** | -1.34743 | -0.58758 | -0.22483 |
| **C21** | -1.34979 | -0.55379 | -0.04952 |
| **C22** | -1.3282 | -0.56611 | 0.15042 |
| **C23** | -1.30424 | -0.61012 | 0.17285 |
| **C24** | -1.37294 | -0.50883 | -0.06954 |
| **C25** | -1.41785 | -0.50627 | -0.15044 |
| **C26** | -1.44151 | -0.4616 | -0.15447 |
| **C27** | -1.42085 | -0.41826 | -0.07736 |
| **C28** | -1.37528 | -0.42037 | -0.00798 |
| **C29** | -1.35168 | -0.46489 | -0.00378 |
| **N30** | -1.4414 | -0.37419 | -0.0565 |
| **C31** | -1.48614 | -0.36323 | -0.06197 |
| **C32** | -1.50284 | -0.31724 | 0.00181 |
| **C33** | -1.47683 | -0.27588 | 0.06059 |
| **O34** | -1.4356 | -0.27381 | 0.01058 |
| **C35** | -1.49458 | -0.23622 | 0.18213 |
| **C36** | -0.77421 | -0.31419 | 0.01422 |
| **C37** | 1.47866 | 1.18793 | 0.1478 |
| **C38** | 1.4929 | 1.14836 | 0.28115 |
| **C39** | 1.52426 | 1.1582 | 0.45105 |
| **C40** | 1.54102 | 1.2055 | 0.48619 |
| **C41** | 1.52649 | 1.2441 | 0.35226 |
| **H42** | -0.97544 | 0.10005 | -0.09029 |
| **H43** | -0.94512 | 0.02418 | -0.16064 |
| **H44** | -0.93501 | 0.01488 | 0.30759 |
| **H45** | -0.8852 | -0.04084 | 0.45142 |
| **H46** | -0.84775 | -0.1178 | 0.42437 |
| **H47** | -0.90093 | -0.13616 | -0.21303 |
| **H48** | -0.93723 | -0.05915 | -0.18848 |
| **H49** | -0.86027 | -0.20693 | 0.40233 |
| **H50** | -0.81985 | -0.28197 | 0.36428 |
| **H51** | -0.78968 | -0.24657 | -0.29252 |
| **H52** | -0.82628 | -0.17008 | -0.25051 |
| **H53** | -1.32119 | -0.65472 | -0.33381 |
| **H54** | -1.36338 | -0.58044 | -0.37038 |
| **H55** | -1.32986 | -0.54313 | 0.28267 |
| **H56** | -1.28985 | -0.61815 | 0.32094 |
| **H57** | -1.43403 | -0.5371 | -0.20376 |
| **H58** | -1.47396 | -0.46122 | -0.2124 |
| **H59** | -1.35896 | -0.38945 | 0.04389 |
| **H60** | -1.31876 | -0.4649 | 0.04959 |
| **H61** | -1.4217 | -0.34718 | -0.02172 |
| **H62** | -1.50934 | -0.38947 | -0.10181 |
| **H63** | -1.53738 | -0.31438 | 0.01242 |
| **H64** | 1.45551 | 1.18172 | 0.02569 |
| **H65** | 1.53519 | 1.13075 | 0.55123 |
| **H66** | 1.56354 | 1.21196 | 0.61043 |
| **H67** | 1.53883 | 1.27827 | 0.38442 |

**Table S2.** Fractional atomic coordinates for the unit cell of Mix-Q1DCOF with AA stacking.

| **Space group PMA2** |  |  |  |
| --- | --- | --- | --- |
| **Calculated cell parameters** |  |  |  |
|  | **a=28.7365Å** | **b= 24.7115Å** | **c= 6.2289Å** |
|  | **α= 90.0000°** | **β= 90.0000°** | **γ= 90.0000°** |
|  | **Rp= 2.72%** | **Rwp=3.58%** |  |
| **Atom** | **x** | **y** | **z** |
| **C1** | -0.99388 | 0.17817 | 0.13628 |
| **O2** | -0.97559 | 0.16765 | -0.0418 |
| **C3** | -0.99081 | 0.14163 | 0.31004 |
| **C4** | -0.96966 | 0.09034 | 0.31098 |
| **N5** | -0.94937 | 0.0677 | 0.13634 |
| **C6** | -0.92813 | 0.01873 | 0.11941 |
| **C7** | -0.9047 | 0.00764 | -0.07481 |
| **C8** | -0.88068 | -0.04143 | -0.10526 |
| **C9** | -0.8796 | -0.08168 | 0.05678 |
| **C10** | -0.90417 | -0.07071 | 0.24919 |
| **C11** | -0.92771 | -0.0215 | 0.2808 |
| **C12** | -0.85449 | -0.13071 | 0.02939 |
| **C13** | -0.82953 | -0.15411 | 0.20213 |
| **C14** | -0.80508 | -0.20293 | 0.17737 |
| **C15** | -0.80178 | -0.22854 | -0.02439 |
| **C16** | -0.82688 | -0.20587 | -0.19729 |
| **C17** | -0.85325 | -0.15832 | -0.16996 |
| **C18** | -1.30036 | -0.67498 | -0.05751 |
| **C19** | -1.32109 | -0.65645 | -0.24928 |
| **C20** | -1.34466 | -0.60647 | -0.2556 |
| **C21** | -1.34762 | -0.57303 | -0.07141 |
| **C22** | -1.32726 | -0.59243 | 0.12066 |
| **C23** | -1.30486 | -0.64284 | 0.12834 |
| **C24** | -1.37106 | -0.52257 | -0.07252 |
| **C25** | -1.41466 | -0.51631 | -0.17551 |
| **C26** | -1.44027 | -0.46807 | -0.15455 |
| **C27** | -1.42331 | -0.42492 | -0.02827 |
| **C28** | -1.37822 | -0.42899 | 0.05874 |
| **C29** | -1.35247 | -0.47709 | 0.03681 |
| **N30** | -1.44845 | -0.38017 | 0.02024 |
| **C31** | 0.51675 | 1.22845 | 0.15625 |
| **C32** | 0.56149 | 1.23228 | 0.24986 |
| **C33** | 0.58421 | 1.28239 | 0.26688 |
| **C34** | 0.56222 | 1.32963 | 0.19344 |
| **C35** | 0.51715 | 1.32753 | 0.10256 |
| **C36** | 0.49513 | 1.27651 | 0.08264 |
| **C37** | 0.49523 | 1.37595 | 0.03984 |
| **C38** | 0.2251 | 1.72386 | -0.04752 |
| **H39** | -1.00517 | 0.15341 | 0.45318 |
| **H40** | -0.97012 | 0.06993 | 0.45357 |
| **H41** | -0.94976 | 0.08966 | 0.00821 |
| **H42** | -0.90457 | 0.03565 | -0.19599 |
| **H43** | -0.86343 | -0.04701 | -0.24721 |
| **H44** | -0.90545 | -0.09863 | 0.36998 |
| **H45** | -0.9446 | -0.01588 | 0.42314 |
| **H46** | -0.8287 | -0.13581 | 0.34917 |
| **H47** | -0.78957 | -0.21962 | 0.30893 |
| **H48** | -0.8264 | -0.22388 | -0.34454 |
| **H49** | -0.87178 | -0.14414 | -0.29809 |
| **H50** | -1.31906 | -0.67914 | -0.38568 |
| **H51** | -1.35949 | -0.59459 | -0.39688 |
| **H52** | -1.32891 | -0.57019 | 0.2587 |
| **H53** | -1.29141 | -0.65572 | 0.27104 |
| **H54** | -1.42884 | -0.54723 | -0.26293 |
| **H55** | -1.4716 | -0.46475 | -0.23049 |
| **H56** | -1.36424 | -0.39742 | 0.14339 |
| **H57** | -1.32008 | -0.47875 | 0.10482 |
| **H58** | 0.57807 | 1.19857 | 0.30583 |
| **H59** | 0.61663 | 1.2845 | 0.33377 |
| **H60** | 0.57923 | 1.36574 | 0.21003 |
| **H61** | 0.46267 | 1.27428 | 0.01518 |
| **H62** | 0.51523 | 1.40981 | 0.0194 |

**Table S3.** Fractional atomic coordinates for the unit cell of Im-Q1DCOF with AA stacking.

| **Space group PMA2** |  |  |  |
| --- | --- | --- | --- |
| **Calculated cell parameters** |  |  |  |
|  | **a=31.2157Å** | **b= 21.5565Å** | **c= 6.0374Å** |
|  | **α= 90.0000°** | **β= 90.0000°** | **γ= 90.0000°** |
|  | **Rp= 6.32%** | **Rwp=8.28%** |  |
| **Atom** | **x** | **y** | **z** |
| **C1** | -0.92031 | 0.06888 | -0.02978 |
| **C2** | -0.87795 | 0.06838 | 0.05023 |
| **C3** | -0.85225 | 0.01518 | 0.02681 |
| **C4** | -0.86819 | -0.03927 | -0.07623 |
| **C5** | -0.90934 | -0.03618 | -0.17436 |
| **C6** | -0.93488 | 0.01723 | -0.15251 |
| **C7** | -0.84463 | -0.09549 | -0.07167 |
| **C8** | -0.82329 | -0.11356 | 0.12491 |
| **C9** | -0.80062 | -0.16962 | 0.13737 |
| **C10** | -0.7971 | -0.20898 | -0.04826 |
| **C11** | -0.81919 | -0.19233 | -0.24342 |
| **C12** | -0.84262 | -0.13653 | -0.25479 |
| **C13** | -1.29715 | -0.6809 | -0.01104 |
| **C14** | -1.30221 | -0.63844 | -0.18691 |
| **C15** | -1.32675 | -0.58422 | -0.15963 |
| **C16** | -1.34762 | -0.57092 | 0.0433 |
| **C17** | -1.34244 | -0.61405 | 0.21839 |
| **C18** | -1.31774 | -0.66806 | 0.19188 |
| **C19** | -1.37326 | -0.51703 | 0.06891 |
| **C20** | -1.41256 | -0.51934 | 0.186 |
| **C21** | -1.43864 | -0.46657 | 0.20857 |
| **C22** | -1.42667 | -0.40947 | 0.11172 |
| **C23** | -1.38728 | -0.40638 | -0.00204 |
| **C24** | -1.36096 | -0.45912 | -0.02243 |
| **N25** | -1.45062 | -0.35699 | 0.11902 |
| **N26** | 0.44495 | 1.11854 | 0.02268 |
| **C27** | 0.48812 | 1.12162 | 0.04146 |
| **C28** | 0.50965 | 1.17597 | 0.10813 |
| **C29** | 0.55316 | 1.17247 | 0.17279 |
| **C30** | 0.57524 | 1.22546 | 0.24515 |
| **C31** | 0.5541 | 1.28288 | 0.25448 |
| **C32** | 0.51069 | 1.28849 | 0.18972 |
| **C33** | 0.48899 | 1.23446 | 0.11668 |
| **C34** | 0.49051 | 1.34694 | 0.19964 |
| **C35** | 0.72714 | 1.26425 | -0.03532 |
| **H36** | -0.86582 | 0.10623 | 0.13121 |
| **H37** | -0.82182 | 0.01638 | 0.08984 |
| **H38** | -0.92177 | -0.07338 | -0.25772 |
| **H39** | -0.96437 | 0.0178 | -0.22475 |
| **H40** | -0.8244 | -0.08633 | 0.26343 |
| **H41** | -0.78676 | -0.18148 | 0.28433 |
| **H42** | -0.81843 | -0.22088 | -0.37833 |
| **H43** | -0.8582 | -0.12613 | -0.39887 |
| **H44** | -1.28826 | -0.64681 | -0.33686 |
| **H45** | -1.32957 | -0.55476 | -0.29155 |
| **H46** | -1.35665 | -0.60666 | 0.36845 |
| **H47** | -1.31497 | -0.69806 | 0.32213 |
| **H48** | -1.42299 | -0.55983 | 0.2554 |
| **H49** | -1.46639 | -0.47062 | 0.29626 |
| **H50** | -1.37746 | -0.3655 | -0.07193 |
| **H51** | -1.3325 | -0.45454 | -0.10487 |
| **H52** | 0.50568 | 1.08227 | 0.01527 |
| **H53** | 0.5692 | 1.1311 | 0.17014 |
| **H54** | 0.60665 | 1.2222 | 0.29191 |
| **H55** | 0.57089 | 1.32064 | 0.30921 |
| **H56** | 0.45758 | 1.23769 | 0.06944 |
| **H57** | 0.50691 | 1.38313 | 0.26835 |

**Table S4.** Comparison of CO production rate with that catalyzed by other metal-free COF photocatalysts and photocatalytic systems

| Sample | Reaction condition | CO Production rate (μmol g-1 h-1) | Selectivity (%) | Ref |
| --- | --- | --- | --- | --- |
| En-Q1DCOF | gas-solid system  visible light ≥420 nm | 137.6 | ~100 | This work |
| Mix-Q1DCOF | gas-solid system  visible light ≥420 nm | 33.5 | ~100 | This work |
| Im-Q1DCOF | gas-solid system  visible light ≥420 nm | 6.5 | ~100 | This work |
| CT-COF | gas-solid system  visible light ≥420 nm | 102.7 | ~100 | [1] |
| 2,3-DhaTph CONs | gas-solid system  visible light ≥420 nm | 132.2 | ~100 | [2] |
| TAPBB-COF | gas-solid system  visible light 200-1000 nm | 24.6 | 95.6 | [3] |
| TT-TAPP | H2O, TEOA/800>λ>200 nm | 18 | 90 | [4] |
| TOT-TAPP | H2O, TEOA/800>λ>200 nm | 34.8 | 90 | [4] |
| En-COF-TAPB-TDOEB | gas-solid system  visible light ≥420 nm | 69 | ~100 | [5] |
| TFB-BDF-COF | gas-solid system  visible light ≥420 nm | 49.5 | ~100 | [6] |
| TFPT-BDF-COF | gas-solid system  visible light ≥420 nm | 158.1 | ~100 | [6] |
| 2N-COF | gas-solid system  visible light ≥420 nm | 98 | ~100 | [7] |

**References**

[1] K. Lei, D. Wang, L. Ye, M. Kou, Y. Deng, Z. Ma, L. Wang, Y. Kong, *ChemSusChem* **2020**, 13, 1725.

[2] Y. Guo, Q. Zhang, S. Gao, H. Wang, Z. Li, J. Qiu, Y. Zhao, Z. Liu, J. Wang, *Green Chem.* **2022**, 24, 9530.

[3] L. j. Wang, R. l. Wang, X. Zhang, J. l. Mu, Z. y. Zhou, Z. m. Su, *ChemSusChem* **2020**, 13, 2973.

[4] D. Zhou, Q. Chen, J. Zhang, T. Wang, Z. Q. Liu, *Angew. Chem. Int. Ed.* **2025**, 137, e202500329.

[5] J. Bai, M. Zhang, F. Si, Y. Li, G. Liang, T. Hou, Y. Li, *Adv. Funct. Mater.* **2025**, 35, 2420218.

[6] J. Sheng, Y. He, J. Li, C. Yuan, H. Huang, S. Wang, Y. Sun, Z. Wang, F. Dong, *ACS Nano* **2020**, 14, 13103.

[7] S. Gao, Q. Zhang, X. Su, X. Wu, X. Zhang, Y. Guo, Z. Li, J. Wei, H. Wang, S. Zhang, *J. Am. Chem. Soc.* **2023**, 145, 9520.
